1 **Filopodia-based contact stimulated collective migration drives tissue**  
2 **morphogenesis**

3

4 Maik C. Bischoff<sup>1</sup>, Sebastian Lieb<sup>2</sup>, Renate Renkawitz-Pohl<sup>3</sup> and Sven Bogdan<sup>1\*</sup>

5

6 <sup>1</sup> Institute of Physiology and Pathophysiology, Dept. of Molecular Cell Physiology,  
7 Philipps-University Marburg, Germany.

8 <sup>2</sup> Computer Graphics and Multimedia Programming, Philipps-University Marburg,  
9 Germany.

10 <sup>3</sup> Developmental Biology, Philipps-University Marburg, Germany.

11

12

13

14 \*) to whom correspondence should be addressed

15 [sven.bogdan@staff.uni-marburg.de](mailto:sven.bogdan@staff.uni-marburg.de)

16

17

18 *Key words*

19 *Drosophila*, testis myotubes, collective cell migration, contact inhibition of locomotion,  
20 CIL, contact stimulation of migration, cell-matrix adhesion, cell shape, lamellipodia,  
21 filopodia, cell motility, actin, Arp2/3, WAVE, formins, Cdc42, Rac, Rho, N-cadherin,  
22 actomyosin, computer simulation

23

24

25

26

27

28

29

30

31 **Abstract**

32 Cells migrate collectively to form tissues and organs during morphogenesis. Contact  
33 inhibition of locomotion (CIL) drives collective migration by inhibiting lamellipodial  
34 protrusions at cell-cell contacts and promoting polarization at the leading edge. Here,  
35 we report on a CIL-related collective cell behavior of myotubes that lack lamellipodial  
36 protrusions, but instead use filopodia to move as a cohesive cluster in a formin-  
37 dependent manner. Genetic, pharmacological and mechanical perturbation analyses  
38 reveal essential roles of Rac2, Cdc42 and Rho1 in myotube migration. They  
39 differentially control not only protrusion dynamics but also cell-matrix adhesion  
40 formation. Here, active Rho1 GTPase localizes at retracting free edge filopodia. Rok-  
41 dependent actomyosin contractility does not mediate a contraction of protrusions at  
42 cell-cell contacts but likely plays an important role in the constriction of supracellular  
43 actin cables.

44 We propose that contact-dependent asymmetry of cell-matrix adhesion drives  
45 directional movement, whereas contractile actin cables contribute to the integrity of  
46 the migrating cell cluster.

47

48

49

50

51

52

53

54

55

56

57

58

59

60

61

62

63

64

## 65 Introduction

66 The ability of cells to migrate as a collective is crucial during tissue morphogenesis  
67 and remodeling<sup>1,2</sup>. The molecular principles of collective cell migration share features  
68 with the directed migration of individual cells. The major driving forces in migrating  
69 single cells are Rac-mediated protrusions of lamellipodia at the leading edge, formed  
70 by Arp2/3 complex dependent actin filament branching and Rho-dependent  
71 actomyosin driven contraction at the cell rear<sup>3,4</sup>. Cells can migrate directionally in  
72 response to a variety of chemical cues, recognized by cell surface receptors that  
73 initiate downstream signaling cascades controlling the activity or recruitment of Rho  
74 GTPases. Directional cell locomotion is also controlled by mechanical stimuli such as  
75 upon cell-cell contact<sup>5-7</sup>. A well-known phenomenon is contact inhibition of  
76 locomotion (CIL), whereby two colliding cells change direction after coming into con-  
77 tact<sup>8,9</sup>. Mayor and colleagues provided first mechanistic evidence how CIL might act  
78 *in vivo* as the driving force to polarize neural crest cells that derived from the margin  
79 of the neural tube and disperse by migration during embryogenesis<sup>10,11</sup>.

80

81 In neural crest cells, CIL involves distinct stages of cell behavior including cell-cell  
82 contact, protrusion inhibition, repolarization, contraction and migration away from the  
83 collision<sup>12</sup>. The initial cell-cell contact requires the formation of transient cadherin-  
84 mediated cell junctions. Once the cells come in close contact, a disassembly of cell-  
85 matrix adhesion near the cell-cell contact and the generation of new cell-matrix  
86 adhesions at the free edge occur. Such mechanical crosstalk between N-cadherin-  
87 mediated cell-cell adhesions and integrin-dependent cell-matrix adhesions has been  
88 recently described *in vivo* during neural crest cell migration in both *Xenopus* and  
89 zebrafish embryos<sup>13</sup>. However, the loss of cell-matrix adhesions at cell contacts  
90 alone is not sufficient to drive CIL. A subsequent repolarization of the cells away from  
91 the cell-cell contact and thereby the generation of new cell-matrix adhesions and  
92 protrusions at the free edge are required to induce cell migration away from the  
93 collision. In neural crest cells, this depends on the polarized activity of the two Rho  
94 GTPases, Rac1 and RhoA<sup>14</sup>. A model of CIL has been proposed in which a contact-  
95 dependent intracellular Rac1/RhoA gradient is formed that generates an asymmetric  
96 force driving directed cell migration<sup>15</sup>. N-cadherin binding triggers a local increase of  
97 RhoA and inhibits Rac1 activity at the site of contact<sup>14,16</sup>. Thus, Rac1-dependent

98 protrusions become biased to the opposite end of the cell-cell contact and cells  
99 migrating away from the collision.

100 Overall, CIL has been successfully used to explain contact-dependent collective  
101 migration of loose clusters of mesenchymal cells such as neural crest cells and  
102 hemocytes<sup>12</sup>, but it is still unclear whether mechanisms governing CIL might also  
103 contribute to the migratory behavior of cohesive cell clusters or epithelia<sup>5,7</sup>.

104 Here, using an integrated live-cell imaging and genetic approach, we identified a CIL  
105 related, contact-dependent migratory behavior of highly cohesive nascent myotubes  
106 of the *Drosophila* testis. Myotubes lack lamellipodial cell protrusions, but instead form  
107 numerous large filopodia generated at both N-cadherin-enriched cellular junctions at  
108 cell-cell contacts and integrin-dependent cell-matrix sites at their free edge.  
109 Filopodia-based myotube migration requires formins and the Rho family small  
110 GTPases Rac2, Cdc42 and RhoA, whereas the Arp2/3 complex and its activator, the  
111 WAVE regulatory complex (WRC) seem only to contribute to filopodia branching.  
112 Rac2 and Cdc42 differentially control not only protrusion dynamics but also cell-  
113 matrix adhesion formation. Unlike CIL, RhoA is not activated at cell-cell contacts, but  
114 rather gets locally activated along retracting protrusions. Genetic and  
115 pharmacological perturbation analysis further revealed an important requirement of  
116 Rho/Rok-driven actomyosin contractility in myotube migration.

117 In summary, we propose a model in which N-cadherin-mediated contact dependent  
118 asymmetry of cell-matrix adhesion acts as a major switch to drive cell movement  
119 towards the free space, whereas contractile actin cables contribute to the integrity of  
120 the migrating cell cluster.

121

122

## 123 **Results**

124

### 125 **Long-term live imaging of *Drosophila* smooth-like testes muscles as a new** 126 **collective cell migration model**

127

128 At 24h after puparium formation (APF), both testes lay free in the body cavity (Figure  
129 1a). The genital disc provides the myoblasts and other somatic parts of the  
130 reproductive system such as the seminal vesicles<sup>17,18</sup>. Testes myoblasts adhere to  
131 the epithelium of the seminal vesicles (Figure 1a, sv) and fuse to small syncytia  
132 shortly before the connection between seminal vesicles and terminal epithelia (Figure  
133 1a, te) has been formed (Figure 1a, b<sup>19,20</sup>). Between 28-30h APF this connection has



134 been established (Figure 1, see arrow between a and b). At 30 h APF nascent  
135 myotubes (Figure 1b, mt in red) start to migrate beneath the pigment cell layer  
136 (Figure 1b, pc) to and along the testes towards the apical end (Figure 1b<sup>21</sup>). At 40 h  
137 APF, myotubes cover the whole pupal testis as a thin muscular sheet<sup>22</sup>.

138 To better understand how myotubes cover the testis, we established a protocol for *ex*  
139 *vivo* organ cultivation and long-term imaging (7 h) of isolated 33h APF pupal testes  
140 (Figure 1c). We used the muscle-specific *mef2-Gal4* or the *heartless-Gal4* (*htl-Gal4*)  
141 driver to express a UAS-LifeAct-EGFP transgene either in myotubes or in both,  
142 myotubes and pigment cells respectively (see supplementary figure S2a). This  
143 method provides an excellent experimental system for studying the highly dynamic  
144 migratory cell behavior of myotubes and to visualize their actin-rich protrusions over  
145 several hours at high resolution. Spinning disc live imaging microscopy of 33 h APF  
146 old testes onwards revealed that myotubes migrate collectively on an ellipsoid  
147 surface constrained by the outermost layer of pigment cells and the basal membrane  
148 enclosing the inner cysts (Figure 1d, e; supplementary movie M1). To better track the  
149 migratory behavior of individual cells within the cell cluster we additionally labeled the  
150 cells by co-expression of the membrane marker mCD8-RFP enabling precise 4D (xyz  
151 and t) trajectory mapping using the Imaris software (Figure 1f; supplementary movie  
152 M2). Since all mathematical directionality descriptors for 2D migration (biased angle,  
153 persistence angle, straightness, etc.) are based on Euclidean geometry, we had to  
154 transform our 3D(+time) datasets into corresponding 2D(+time) datasets for precise  
155 cell quantification. A simple xy-projection would neglect curvature and lead to wrong  
156 results. Preexisting tools using unwrapping algorithms and Riemannian manifold  
157 learning were not compatible with our system<sup>23</sup>. Instead of an unwrapping algorithm  
158 fit for every kind of surface, but with some restrictions in angle and distance  
159 accuracy, we developed a Mercator-projection based process, which allows for high  
160 angle-accuracy but neglects distances (illustrated in supplementary figure S3 b-f).

161 Dissecting the cell trajectories of wild type myotubes revealed a directional cell  
162 behavior with maximal cell movement into the base-apex direction with a speed  
163 about 0.37  $\mu\text{m}/\text{min}$  over a distance of about 130  $\mu\text{m}$  (Figure 1f', Figure 4q,  
164 supplementary figure S2g; supplementary movie M2). Once myotubes reached the  
165 testis apex they started to elongate and form large actin bundles that aligned  
166 perpendicular to the pupal testis surface (Figure 1g, supplementary movie M1,

167 middle). After completing pupal development, myotubes form a densely packed  
168 muscle sheath surrounding the elongated, tubular adult testis (Figure 1h, h').

169

170 **Myotube migration depends on formin-dependent filopodial membrane**  
171 **protrusions**

172

173 Strikingly, migrating myotubes largely lacked lamellipodial protrusions, but instead  
174 formed numerous filopodia-like protrusions (from here on referred to as filopodia;  
175 Figure 1i; supplementary movie M3). Expression of LifeAct-EGFP together with a  
176 nuclear targeted EGFP transgene in myotubes in a mosaic-like fashion further  
177 showed that myotubes also formed prominent filopodial protrusion between  
178 neighboring cells (Figure 1j.; supplementary movie M4). To better characterize the  
179 distribution of filopodia in these cells, we quantified the directionality of filopodia of  
180 cells by measuring the orientation angle as illustrated in figure 1m and m'. This  
181 analysis revealed no strong bias in filopodia generation or directionality in cells within  
182 the cluster (Figure 1n) and surprisingly also at the front edge of the cluster  
183 (Figure 1o). To statistically analyze this, we differentiate the filopodia (in cells at the  
184 front edge) in those which are assembled at the cell front (pointing to the testis apex)  
185 and those at the "rear" (pointing to the testis base; Figure 1kl). To account for  
186 irregular cell shapes, we calculated the density (number/ $\mu\text{m}$ ) by measuring edge  
187 length. There was no significant difference in filopodia density between front and  
188 rear. Thus, the directionality of collective myotube migration cannot be simply  
189 predicted by filopodia number or direction.

190

191 We next determined how central actin nucleators such as formins and the Arp2/3  
192 complex contribute to filopodia formation and myotube migration. Treatment with the  
193 specific Arp2/3 inhibitor CK-666<sup>24</sup> did not strongly affect the overall cell cluster  
194 morphology compared to control cells incubated with DMSO (Figure 2a, b and c;  
195 supplementary movie M5). Likewise, cells depleted of the *arp3* subunit or *wave* by  
196 RNA interference (RNAi) showed moderate changes in cell morphology despite  
197 prominent fusion defects (see mononucleated myotubes marked by co-expression of  
198 the mCD8-RFP marker excluded from the nuclei in figure 2e; supplementary movie  
199 M6). Similar to CK666 treatment, *arp3* and *wave* depleted cells were still able to  
200 migrate persistently in a directed fashion (Figure 2b-e'; supplementary figure S2h.  
201 However, cells depleted of the *arp3* subunit or treated with CK666 showed a

202 significantly reduced migration speed and distance along the x-axis (compare  
203 migratory tracks in figure 2a, b and d; quantification in figure 2h supplementary figure  
204 S2g). Thus, the Arp2/3-WRC pathway promotes motility, but seems to be  
205 dispensable for directed migration of myotubes.

206 By contrast, treatment with the pan-formin small-molecule inhibitor SMIFH2<sup>25</sup>  
207 strongly affected cell morphology and completely disrupted collective myotube  
208 migration (Figure 2f, g and g'; supplementary movie M7; quantification in figure 2h,  
209 S2 g). Compared to CK666 treatment, cells treated with SMIFH2 showed a  
210 prominent reduced number of dynamic, but instead highly branched filopodia-like  
211 protrusions (Figure 2k; supplementary movie M7). Interestingly, cells co-treated with  
212 CK666 and SMIFH2 completely lacked these branched filopodial protrusions  
213 suggesting that their formation or branching depends on a still prominent Arp2/3  
214 complex activity in SMIFH2 treated cells (Figure 2l). Supporting this notion, cells only  
215 depleted for Arp3 showed a reduction in filopodia branches resulting in a significant  
216 reduction of protrusions (Figure 3a, b; quantification in c). Consistently, an Arp3-  
217 EGFP transgene localized close to newly forming branches as we recently found in  
218 dendrite branchlet formation of *Drosophila* larval sensory neurons (arrowheads in  
219 Figure 3d, e<sup>26</sup>). Interestingly, we also found a strong accumulation of the Arp3-EGFP  
220 at cell-cell contacts, an observation made in different cell systems (asterisks in Figure  
221 3e').

222

223 Taken together, these findings suggest that Arp2/3 activity is required in filopodia-  
224 branching, whereas the activity of formins are essential to generate filopodial  
225 protrusions. RNAi-mediated suppression of single *Drosophila* formins did not result in  
226 prominent protrusion or migration defects (see supplementary table 1), suggesting a  
227 potential redundant and synergistic functions of different formins in protrusion  
228 formation.

229

230 **Migrating myotubes preferentially form more stable cell-matrix adhesions at**  
231 **their free edge**

232

233 It is generally believed that filopodia may promote mesenchymal migration by  
234 promoting cell-matrix adhesiveness at the leading edge to stabilize the advancing  
235 lamellipodium<sup>27</sup>. Migrating myotubes lack lamellipodia, but instead filopodia appear  
236 to be critical for myotube migration as inhibition of their formation by interfering with

237 formin function results in a complete loss of migration. Expression of a cell-matrix  
238 adhesion targeting reporter (FAT-EGFP<sup>28</sup>) revealed that migrating myotubes indeed  
239 formed numerous cell-matrix anchorage sites at the base, along the shaft, and at the  
240 tip of filopodia (Figure 3f; supplementary movie M8). Multiple cell-matrix adhesions  
241 were built in a single filopodium, giving them a beaded appearance (Figure 3g;  
242 supplementary movie M8). Cell-matrix adhesions formed along filopodia shafts  
243 subsequently seemed to move rearwards, along a retrograde flow of bundled actin  
244 filaments, eventually getting disassembled in the outer rim of the cell body (Figure  
245 3g; supplementary movie M8). Co-expression with a LifeAct-RFP reporter marked  
246 especially thicker actin bundles attached to large, more elongated cell-matrix  
247 adhesion structures that shows a more classical appearance of matrix adhesions  
248 found in lamellipodia (Figure 3h-h”).

249 Remarkably, the number of cell-matrix adhesions within single cells at the front edge  
250 of the cluster correlates with the presumed direction of migration towards the testis  
251 tip (Figure 3k). Cells formed an increased number of cell-matrix adhesions at the  
252 migrating front (pointing to the testis apex; figure 3i) when compared to the rear. An  
253 even more pronounced difference becomes apparent, when instead of comparing  
254 front and rear, cell-matrix adhesions are divided into those build at the free edge  
255 (excluding free edge regions comprising actin cables marked in blue) versus the cell-  
256 cell edge as illustrated in figure 3j, k. Quantitative analysis of matrix adhesion  
257 dynamics further showed that cell-matrix contacts formed at free edges showed  
258 significantly increased lifetime compared to those close to cell-cell contacts (Figure  
259 3l-l”); supplementary movie M9; quantification in figure 3n). This asymmetric  
260 distribution of cell-matrix adhesion implies that polarization along the cell edge of  
261 myotubes does not require specialized leader cells, as observed in endothelial cells  
262 or border cell migration<sup>29</sup>. It rather appears to be a response on exhibiting free edge  
263 and potentially can occur in every cell within the cluster. Consistently, an increase of  
264 free edges within the cell cluster was accompanied with the formation of new matrix  
265 adhesions as ablation experiments showed. Myotubes immediately migrated when  
266 exposed to an empty space and filled the gaps within laser-induced wounds (Figure  
267 3o; supplementary movie M10).

268

269 **Reduced N-cadherin expression promotes single cell migration at the expense**  
270 **of collective directionality**

271

272 Reduced cell-matrix adhesion density of myotubes in contact might be due to an  
273 enhanced disassembly of cell-matrix complexes at cell-cell contacts as previous  
274 reported for neural cells undergoing CIL<sup>13</sup>. Migratory myotubes predominantly  
275 express N-cadherin as a key adhesion molecule of cell-cell contacts<sup>30</sup>, which is  
276 essential in early *Drosophila* embryogenesis<sup>31</sup>. N-cadherin was not only found along  
277 adjacent membranes of myotube sheets at the testis base (Figure 4a, b, b'), but were  
278 also highly enriched along the bridges of interdigitating filopodia (Figure 4c, c', e, e').  
279 In contrast, single myotubes without any cell neighbor that were rarely observed  
280 (Figure 4f, f') completely lacked N-cadherin clusters at their free edge filopodia. Live  
281 imaging of migrating myotubes expressing a N-Cad-EGFP transgene confirmed a  
282 highly dynamic accumulation at cell-cell contacts and along filopodia forming initial  
283 contacts between neighboring cells (Figure 4g; see also supplementary movie M11).  
284 To further test the importance of N-cadherin-dependent cell-cell contacts in  
285 controlling the collective behavior of myotubes we used an RNAi approach to  
286 downregulate N-cadherin expression in myotubes by using the *mef2*-Gal4 driver  
287 (Figure 4h, i; supplementary movie M12). Expression of two different RNAi  
288 transgenes efficiently downregulates N-cadherin protein level as shown by  
289 immunostainings of adult testes (Supplementary figure S2 h, i, quantification in S2 j).  
290 Myotubes depleted for N-cadherin are still able to migrate, and even change more  
291 frequently their relative positions with each other within the moving cluster (Figure 4h,  
292 i; supplementary movie M12). Expression of different *N-cad* RNAi transgenes  
293 resulted in an obvious increase of free cell edges with prominent cell-matrix  
294 adhesions (Figure 4j, k; supplementary movie M13) and increased gaps between  
295 migrating myotubes (Figure 4l, m) in a dosage-dependent manner, but did not affect  
296 the cell number or cell size (Supplementary figure S2b, c, d and e). Consistently,  
297 suppression of N-cadherin led to a significantly decreased neighbor permanency  
298 suggesting that indeed a reduced N-cadherin function weakened cell-cell adhesions  
299 (Figure 4n). Quantitative analysis of the migration pattern of individual cells further  
300 revealed prominent changes of the migratory behavior. Overall, the total migration  
301 distance along the x-axis was not affected indicating that N-cadherin-depleted cells  
302 migrate as far as wild type cells (Figure 4o; supplementary movie M12). However, N-  
303 cadherin-depleted cells migrate significantly less directional but faster compared to  
304 wild type cells (Figure 4p, q). Thus, myotubes did not display a leader-follower cell  
305 dynamics, in which leader cells drag inherently passive followers cells by means of

306 strong cell-cell cadherin contacts. By contrast, N-cadherin-mediated cell-cell contacts  
307 seem to be required for the directionally coordinated migratory behavior of myotubes.

### 308 **Migrating myotubes need cell-cell contact to achieve directionality**

309  
310 To further test whether myotubes require cell-cell contacts for their directional cell  
311 migration, we performed laser ablation experiments. Isolation of single myotubes by  
312 laser ablation of the adjacent neighboring cells on the testis created a situation, in  
313 which a cell is surrounded by free edge. After the ablation, the isolated cells  
314 immediately ceased directional migratory behavior and cells formed numerous  
315 filopodial protrusions pointing in all directions (Figure 5a-c; supplementary movie  
316 M14). Once those cells got in close contact to adjacent cells, they started to migrate  
317 forward along those migratory sheets as a collective (Figure 5d, e; supplementary  
318 movie M14). Single cell tracking before and after cell-cell contact confirmed a  
319 contact-dependent migratory cell behavior of myotubes, a phenomenon that is  
320 reminiscent of CIL (Figure 5e-g). Remarkably, such a contact-stimulated migratory  
321 behavior could not be observed between two individual cells, which were still  
322 connected by cell-cell junctions but isolated from remaining cell cluster by laser  
323 ablation (Figure 5h; supplementary movie M15). Cell pairs neither migrated away  
324 from each other nor became polarized pointing protrusions into opposite directions,  
325 but instead always stuck together with constant contact distance over time (Figure 5  
326 i, j supplementary movie M15).

### 327 328 **Rac2 and Cdc42 functions play important roles in myotube migration shaping** 329 **testis morphology**

330  
331 Cell adhesions are not only required to mechanically couple cells within the cluster,  
332 but also to link adhesion complexes to the actin cytoskeleton controlling the  
333 protrusion dynamics and directionality<sup>32</sup>. Rho GTPases are critical molecular players  
334 that regulate adhesions and motility during single and collective cell migration<sup>33,34</sup>.

335 To identify such key players contributing to myotube migration we used an RNAi  
336 approach to screen numerous candidate genes (see supplementary table 1). Defects  
337 in testis myotube migration during pupal metamorphosis can be identified by a  
338 prominent disturbed morphology of adult testis (supplementary figure S1a-l; <sup>30</sup>. The  
339 adult testis is a pair of thin tubules of 2.5 coils and ~2 mm in length surrounded by a  
340 sheath of multinuclear smooth-like muscles<sup>19,30</sup>. Defective N-cadherin-mediated cell-  
341 cell adhesion resulted characteristic holes in the muscle sheet<sup>19</sup>, where myotubes



342 were not properly attached to one another (supplementary figure S1a, c, e). In  
343 contrast, defects in myotube migration resulted in an abnormal testis morphology  
344 with reduced coils and bulky tips (Supplementary figure S1a, f-k). Depending on the  
345 phenotypic strength the muscle sheath only partially or completely failed to cover the  
346 entire testis resulting into strong elongation/coiling defects (supplementary figure  
347 S1a). Strong abnormalities were observed following RNAi-mediated suppression of  
348 Cdc42 and Rac2 functions, one of the two very similar *rac* genes in *Drosophila*<sup>35</sup>. In  
349 both cases, the adult testes were smaller than in the wild type with reduced coils and  
350 bulky tips (Supplementary figure S1f, g). The muscle sheath either did not cover the  
351 entire testes with numerous large holes. In comparison, suppression of Arp2/3  
352 complex subunits and single subunits of the WAVE regulatory complex (WRC<sup>36</sup>)  
353 such as WAVE and the Rac-effector Sra-1, resulted into more moderate  
354 morphological defects compared to *rac2* or *cdc42* depletion. Adult testes deficient for  
355 Arp3, WAVE and Sra-1 still had about 1.5 to 2 coils, however many myotubes also  
356 did not reach the testis apex resulting into bulky tips (Supplementary figure S1h-j).

357

358

### 359 **Rac2 and Cdc42 are required for myotube migration by differentially regulating** 360 **cell-matrix adhesions**

361

362 Compared to suppression of the Arp2/3-WRC pathway, knockdown of Rac2 functions  
363 led to stronger defects in membrane protrusions and cell migration suggesting that  
364 Rac2 might have additional roles in myotube migration (Figure 6a, d; compare  
365 quantification in supplementary figure S2g). *rac2*-depleted cells showed a severely  
366 changed cell morphology with thinner and highly dynamic filopodial protrusions.  
367 These filopodia were unable to adhere stably (Figure 6g, g'; supplementary movie  
368 M16, M17). Supporting this notion, live-cell imaging of *rac2* knockdown cells using  
369 the FAT-EGFP reporter revealed a prominent loss of cell-matrix adhesion contacts  
370 (Figure 6l, supplementary movie M18). Since *mef2*-Gal4 driven FAT-EGFP is still  
371 normally enriched in integrin-dependent adhesion structures such as muscle  
372 attachment sites of the larval body wall musculature, a general impact of Rac2  
373 function on matrix adhesion can be excluded (Supplementary figure S1m, n).

374 Suppression of Cdc42 function also severely impaired migration speed resulting in a  
375 strongly reduced migration distance on the x-axis (Figure 6b, e; supplementary movie  
376 M15; compare quantification in supplementary figure S2g). However, compared to

377 *rac2*-depleted cells, *cdc42*-deficient myotubes showed an increase of thin and  
378 prolonged filopodia (Figure 6g, g'; supplementary movie M17, M19). Overall, the  
379 *cdc42*-depleted myotubes showed an elongated cell shape with numerous gaps  
380 between adjacent cells. Live-cell imaging of *cdc42* knockdown cells using the FAT-  
381 EGFP reporter revealed a significantly increased lifetime of cell-matrix adhesions  
382 (Figure 6m; quantification in figure 6n; supplementary movie M18). Compared to wild  
383 type cells, the cell-matrix adhesions remained much longer, even when they reached  
384 the trailing end of a migrating cell (Supplementary movie M18). In summary, Rac2  
385 and Cdc42 are both required for myotube migration, but appear to differentially  
386 regulate cell-matrix adhesions.

387

### 388 **Activated Rho1 is not enriched at cell-cell contacts**

389

390 The activity of Rho1<sup>37,38</sup>, the *Drosophila* homologue of RhoA, appears to be as  
391 essential for myotube migration as Cdc42 and Rac2. RNAi-mediated suppression of  
392 Rho1 but not RhoL activity in myotubes indeed resulted in strong morphological  
393 defects of the testes, and even under low RNAi transgene expression (using *lbe*-Gal4  
394 driver) *rho1* depleted myotubes showed strong migration defects (see supplementary  
395 figure S1k, table 1). Suppression of the same RNAi transgenes using the *mef4*-Gal4  
396 driver resulted into an early pupal lethality (data not shown, supplementary table 1).

397 Different from neural crest cells undergoing CIL, activated Rho1 was not enriched at  
398 cell-cell contacts between myotubes (Figure 7a). Live imaging of migrating myotubes  
399 coexpressing a Rho1-GTP biosensor or Anillin Rho-binding domain fused to GFP  
400 (Anil.RBD-GFP<sup>39</sup> and a LifeAct-RFP transgene uncovered highly dynamic, local  
401 pulses of Rho1 activity along retracting filopodial protrusions at free edges (Figure  
402 7a, b; supplementary Movie M20). Rho1 activation appeared to be synchronous with  
403 backward movement of retracting filopodial protrusions (Figure 7b; supplementary  
404 Movie M20). Once a protrusion has been completely retracted, activated Rho1  
405 disappeared. Remarkably, retracting protrusions were often followed by new forward-  
406 directed protrusions at the same region without any Rho1 signal (Figure 7b,  
407 Supplementary Movie M20). Thus, migrating myotubes are not simply polarized  
408 along a front-rear axis.

409

### 410 **Myotube migration requires Rok-dependent actomyosin contractility**



411

412 Rho1 is known to control myosin II-dependent contraction through the protein kinase  
413 Rok shaping cells into tissue in a large variety of morphogenetic events during  
414 development<sup>40,41</sup>. To test whether Rok-dependent actomyosin-mediated contractility  
415 is required for myotube collective migration, we first inhibited contractility by treating  
416 ex vivo cultured pupal testes with the specific Rok inhibitor Y-27632<sup>42</sup> and with  
417 blebbistatin<sup>43</sup> or rather its photostable derivate para-nitro-blebbistatin<sup>44</sup>, which  
418 targets the action of the myosin II (Figure 7c, Supplementary Movie M21). Compared  
419 to control cells treated with DMSO, we found similar striking changes in cell  
420 morphology in a time-dependent manner that eventually disturb myotube cell  
421 migration (Figure 7c, e, f; supplementary Movie M21). Following treatment with Y-  
422 27632 or blebbistatin, the myotube cell cluster was still able migrate, but became  
423 dramatically elongated with long interconnecting cell processes as expected for a  
424 tissue under stretch. As consequence, the cell cluster showed large gaps between  
425 individual cells, which dramatically increased in the total size over time (see  
426 quantification in figure 7h). Consistently, RNAi-mediated depletion of both the  
427 regulatory light chain of the myosin II (*spaghetti squash*, *sqh*) and the myosin II  
428 heavy chain (*zipper*, *zip*) phenocopies the pharmacological inhibition of Rok (Figure  
429 7d, g, supplementary Movie M21; quantification in figure 7h). Migratory defects and  
430 the inability to tighten up the cell cluster finally led to small adult testes with reduced  
431 coils and bulky tips with numerous large holes in the muscle sheet similar to those  
432 depleted of Rho1 (compare figure 7k, l with supplementary figure S1b, k). In  
433 conclusion, these data show an important role of Rok-driven actomyosin contractility  
434 in collective myotube migration. Together, our data do not support that actomyosin-  
435 dependent contractility is required for myotube forward movement, but rather  
436 contribute to the integrity of the migrating cell cluster.

437

## 438 **Discussion**

### 439 **Myotube migration – a new model system for collective cell migration**

440 In this study, we established a new model system for studying collective cell  
441 migration in organ culture that allows high-resolution long-term live-imaging  
442 microscopy combined with genetic, pharmacological, and mechanical perturbation  
443 analysis. Our data implies that a contact-dependent migration mechanism acts as a

444 driving force to polarize *Drosophila* myotubes and to promote their directional  
445 movement along the testes. A contact-stimulated migration has been already  
446 observed in cultured cells many years ago, but the molecular mechanisms underlying  
447 this phenomenon has been never analyzed in more detail <sup>45</sup>. Thomas and Yamada  
448 observed that both primary neural crest cells and two neural-crest-derived cell lines  
449 barely moved when isolated in suspension, but could be stimulated up to 200-fold to  
450 migrate following contact with migrating cells <sup>45</sup>. This process might help to ensure  
451 the cohesion and coordination of collectively migrating myotubes to form dense  
452 muscular sheets in the walls of developing hollow organs. Those muscle fibers that  
453 race ahead will immediately cease migration when they lose contact with their  
454 neighbors. That is exactly what we observed in our experiments. After ablation, an  
455 isolated myotube awaits restimulation by the other cells of the migrating cluster.  
456 Consistently, reduced N-cadherin function promotes single cell migration toward the  
457 free space at the expense of collective directionality. The contact-dependent  
458 behavior of myotubes also resembles contact inhibition of locomotion (CIL), a well-  
459 characterized phenomenon <sup>16</sup>. CIL regulates the *in vivo* collective cell migration of  
460 mesenchymal cells such as neural crest cells by inhibiting protrusions forming within  
461 the cluster at cell-cell edges and by driving actin polymerization at their free edge <sup>46</sup>.  
462 Different from neural crest cells, myotubes did not migrate as loose cohorts, but  
463 maintain cohesiveness (see model in figure 8). In the context of more-adhesive cells,  
464 a CIL-related mechanism, termed “frustrated” CIL has been proposed by which cell-  
465 cell junctions can determine the molecular polarity of a collectively migrating  
466 epithelial sheet <sup>47,48</sup>. The authors provided evidence that cell-cell junctions determine  
467 the molecular polarity through a network of downstream effectors that independently  
468 control Rac activity at the cell free end and Rho-dependent myosin II light chain  
469 (MLC) activation at cell-cell junctions <sup>47,48</sup>. At the first glance myotubes do not show  
470 an obvious polarized cell morphology with prominent polarized protrusions. Instead,  
471 myotubes form numerous competing protrusions in all directions. However,  
472 protrusions pointing to the free space preferentially form more stable cell-matrix  
473 adhesions as anchorage sites for forward protrusions, whereas the lifetime of cell-  
474 matrix adhesions at cell-cell contacts is decreased. Thus, a contact-dependent  
475 asymmetry in matrix adhesion dynamics seems to be important for the directionality  
476 of migrating myotubes, a molecular polarity that has been also found in neural crest  
477 cells undergoing CIL <sup>13,49</sup>. Only when one of the adhesions of competing protrusions

478 disassembles, pulling of the cell body towards the competing protrusions might  
479 contribute to symmetry breaking and directionality of collective migration (see model  
480 in figure 8).

481

482

### 483 **Rho GTPases differentially regulate myotube migration**

484 We further provide evidence for a differential requirement of the Rho GTPases, Rac2  
485 and Cdc42 in regulating cell-matrix adhesion. *cdc42* knockdown cells formed less  
486 cohesive clusters and showed a significant increase of cell-matrix adhesion lifetime  
487 probably due to a decrease cell-matrix adhesion turnover. In contrast, Rac2 depletion  
488 resulted in a prominent loss of cell-matrix adhesions, a phenotype that has already  
489 been described in *Rac1*<sup>-/-</sup> mouse embryonic fibroblasts<sup>50</sup>. Thus, we propose a model  
490 in which cell-matrix adhesions are downregulated at N-cadherin-dependent cell-cell  
491 contacts, a process that requires Cdc42 functions. To finally test whether a contact  
492 dependent reduction of cell-matrix adhesion in filopodia is sufficient to explain the  
493 observed collective cell behavior, we developed a simplified simulation model with a  
494 few rules governing cell behavior such as protrusive filopodia, matrix adhesion, cell-  
495 cell adhesion, and membrane resistance (Supplementary movie M22). Unlike  
496 comparable computer models<sup>51,52</sup>, single cells do not possess directional  
497 information. A cell's position is defined by the geometric center of all its filopodia,  
498 whose emergence/disappearance/elongation causes translation of the centroid,  
499 perceived as motion. Upon cell-cell contact, filopodia lose their cell-matrix adhesion  
500 and thereby their grip on the ECM, but keep connections through cell-cell adhesions.  
501 These adhesions are recognized by both contributing cells to calculate their  
502 respective centroids (see supplementary material). Using these simple rules, we  
503 could indeed model myotube collective migration, provided that cells are positioned  
504 in a confined area mimicking the unfolded testis surface (Supplementary movie M22  
505 2A, 2B). If filopodia disappear directly after contact, cells exhibit a different cell  
506 behavior that is very reminiscent of CIL (Supplementary movie M22 2C). This  
507 simplified model further confirms our observation that local regulation of cell-matrix  
508 adhesion suffices to drive collective motility.

509

510 **Actomyosin function ensures the integrity of cohesive myotube cluster during**  
511 **migration**

512 Myotube migration also requires Rho1 the *Drosophila* homologue of RhoA. Different  
513 from cells undergoing CIL, in migrating myotubes activated Rho1 was not enriched at  
514 cell-cell contacts between myotubes, but rather localized as local pulses along  
515 retracting filopodial protrusions at free edges. The effects of tensile forces have to be  
516 addressed separately in the future, by establishing one of the many existing force  
517 measurement techniques such as transition force microscopy (TFM) or using *in vivo*  
518 FRET-based tensions sensors in this system. We show that loss of Rok activity, *sqh*  
519 and *zip* phenocopies *rho1* knockdown suggesting that a canonical pathway controls  
520 myotube migration in which Rho1 acts through Rok kinase to activate myosin II  
521 contractility. This finding supports the notion that in testis myotubes, unlike many  
522 other cell types, locally restricted Rho-GTPase regulation outweighs global Rac/Rho  
523 regulation along the cell-rear axis to achieve directionality. Previous studies  
524 demonstrated that myosin II-dependent contraction is essential for coordinating the  
525 CIL response in colliding cells. In myotube migration, Rok-dependent actomyosin  
526 contraction seems to be not required to drive the myotube cluster forward, but rather  
527 contractile actin cables contribute to the integrity of the migrating cell cluster. Thus,  
528 myotube cluster behave more like a collectively migrating monolayered epithelial  
529 sheet during gap closure<sup>53</sup>. While myotubes migrate into any given free space, they  
530 leave larger gaps within the cell sheet surrounded by prominent circumferential actin  
531 cables. Constriction of these supracellular actin cables necessarily might lead to gap  
532 closure observed in wildtype, but not in cells defective for RhoRok-driven actomyosin  
533 contractility.

534

### 535 **Filopodia based-myotube migration depends on the differential function of** 536 **formins and the Arp2/3 complex**

537

538 Efficient mesenchymal cell migration on two-dimensional surfaces is thought to<sup>54</sup>  
539 require the Arp2/3 complex generating lamellipodial branched actin filament networks  
540 that serve a major engine to push the leading edge forward .

541 Interestingly, epithelial and mesenchymal cells form more filopodia when the Arp2/3  
542 complex is absent<sup>55-57</sup>. Under these conditions, mesenchymal cells lack lamellipodia  
543 and adopt a different mode of migration only using matrix-anchored filopodial  
544 protrusions. Our data further provide evidence for a filopodia-based cell migration in  
545 a physiological context during morphogenesis. This migration mode largely depends  
546 on formin as central known actin nucleators generating filopodia<sup>33,58</sup>. Our data also

547 suggest that the Arp2/3 and its activator, the WRC contribute to a more efficient  
548 myotube migration by promoting filopodia branching, and thereby increasing the  
549 number of cell-matrix adhesions, thus increased anchorage sites. Overall, filopodia-  
550 based migration enables the cell to regulate discrete subunits of membrane  
551 protrusions as an answer to the environment. The sum of filopodial protrusions adds  
552 up to a net cell locomotion that occurs similarly during lamellipodial migration please  
553 compare figure 8). Filopodial matrix adhesion complexes not only provide anchorage  
554 sites, but also allow cells to directly restructure their microenvironment by membrane-  
555 bound matrix proteases. There is indeed increasing clinical evidence suggesting  
556 filopodia play a central role in tumor invasion <sup>27,59</sup>. Similar to invading cancer cells  
557 myotubes rather migrate through a 3D microenvironment composed of extracellular  
558 matrix restricted by pigment cells from the outside of the testis. Thus, it will be  
559 interesting to determine to what extent extracellular matrix restructuring by  
560 metalloproteinases is required for myotube migration.

561

562 Taken together, our data suggest that contact-stimulated filopodia-based collective  
563 migration of myotubes depends on a CIL-related phenomenon combining features  
564 and molecular mechanisms described in mesenchymal and epithelial sheet migration  
565 as well. We propose a model in which contact-dependent asymmetry of cell-matrix  
566 adhesion acts as a major switch to drive directional motion towards the free space,  
567 whereas contractile actin cables contribute to the integrity of the migrating cell  
568 cluster.

569

## 570 **Experimental procedures**

### 571 ***Drosophila* Genetics**

572 Fly husbandry and crossing were carried out according to the standard methods <sup>60</sup>.  
573 Crossings and all UAS-Gal4-based Experiments including RNAi were performed at  
574 25 °C. The following fly lines were used: *mef2*-Gal4 <sup>61</sup>, *beatVC*-Gal4 (BL-40654), *htl*-  
575 Gal4 (BL-40669), *lbe*-Gal4 (BL-47974), UAS-LifeAct-EGFP (BL-35544), UAS-LifeAct-  
576 RFP (BL-58715), UAS-GFP nls (BL-4775), UAS-mcd8-RFP (BL-32219), UAS-myr-  
577 mRFP (BL-7119), cell-matrix adhesion sensor UAS-fat-GFP <sup>28</sup>; RhoA-activity sensor  
578 Ubi-Anillin.RBD-GFP <sup>39</sup>. All UAS-RNAi lines we used are summarized in table 1  
579 (Supplementary data). CyO/Sco; TM2/TM6B was used as a tool for multi-step  
580 crossings, control crossings were conducted using *w*<sup>1118</sup>.

581

## 582 ***Immunohistochemistry and fluorescence staining***

583 Adult and pupal testis fixation and antibody staining was performed as described  
584 elsewhere<sup>19</sup>. The following antibody was used: anti-Cadherin-N (1:500, DSHB DN-  
585 Ex #8). The following secondary antibodies were used: Alexa Fluor 488 (*Molecular*  
586 *Probes*). Alexa Fluor Phalloidin 568 (*Molecular Probes*) staining on pupal testes was  
587 carried out during the secondary antibody incubation for 2 h (1:1000 in PBS). Adult  
588 testes were stained overnight (1:1000 in PBS). DAPI (*Molecular Probes*) was  
589 performed for 10 min.

590

## 591 ***Microscopy/4D live cell imaging of testicular nascent myotubes***

592 Fixed pupal testes were embedded in Fluoromount-G (SouthernBiotech) and imaged  
593 on object slides. Adult testes were imaged in live-culture dishes in PBS, to maintain  
594 their natural shape. Light micrographs were taken with a Leica M165 FC stereo  
595 microscope equipped with a Leica DFC7000 T CCD camera. All fluorescent  
596 microscopic stills were taken with a Leica TCS SP8 with a HC PL APO CS2 20x/0.75  
597 dry objective. 4D live cell imaging was performed on developing testes of 33 h APF  
598 pupae. Prepupae were collected and timed as described elsewhere<sup>30</sup>. Life imaging  
599 of pupal testes was performed like on egg chambers, as described before<sup>62</sup>. Images  
600 were taken on a Zeiss Observer.Z1 with a Yokogawa CSU-X1 spinning disc scanning  
601 unit and an AxioCam MRm CCD camera (6.45  $\mu\text{m}$  x 6.45  $\mu\text{m}$ ). Long-term imaging  
602 was performed using a LD LCI Plan-Apochromat 25x/0.8 Imm Korr DIC oil-immersion  
603 objective over 7 h, with a z-stack every 5 min. Close-ups were taken with a C Plan-  
604 Apochromat 63x/1.4 oil-immersion objective over 2 h, with a z-stack every 2 min.  
605 Laser ablation of single cells on the testis was performed with a Rapp TB 355 laser.

606

## 607 ***Chemical inhibitors***

608 Live imaging experiments with chemical inhibitors were performed exactly as  
609 described above. All inhibitors were pre-solved in DMSO and stored at -20°C. The  
610 following inhibitors were used: CK666 (100  $\mu\text{M}$ , *Sigma-Aldrich*), Formin inhibitor  
611 SMIFH2 (10  $\mu\text{M}$ , *Abcam*), para-nitro-blebbistatin (10  $\mu\text{M}$ , Cayman Chemical), Rok  
612 inhibitor Y-27632 (10  $\mu\text{M}$ , Cayman Chemical).

613

## 614 ***Data processing and quantification with Fiji***



615

616 Filopodia angles were obtained by manually tracking filopodia tips using the *Multiple*  
617 *Points* tool. The center of mass was calculated in Fiji. Testes for single cell analysis  
618 (marked with beatVC-Gal4 >> lifeact-EGFP) were always oriented with the testis tip,  
619 the presumptive destination, pointing left (See Figure 1m'). The angle of the vector  
620 between filopodia tip and center of mass was calculated in R using the package  
621 *matlib*. Rose plots were generated using the package *ggplot2*. Membrane length for  
622 filopodia density (number per  $\mu\text{m}$  membrane) was quantified with the *Free Hand Line*  
623 tool and R. For single cell analysis of oriented images, points left of a virtual  
624 horizontal line crossing the center of mass (front) were compared to points on the  
625 right-hand side (rear, see Figure 1k). For processing and quantification of adhesion  
626 defects on still images a ROI with a defined size (120 x 220 px), in the middle of the  
627 migrating sheet was chosen. To obtain a black-and-white image for further analysis,  
628 a threshold was set (min: 299, max: 300). The cell number inside the ROI was  
629 counted. All further values were assessed using the *Analyze>Analyze Particles*-Tool.  
630 Area per cell was derived from the total area/cell number. Free cell edge was derived  
631 from the sum of all perimeters, as they constitute the length of black-to-white border,  
632 which is tantamount to the free cell edge. The gap number was derived from the  
633 number of coherent particles, when black-and-white picture are inverted (see also  
634 supplementary figure S2 B, C). The size of gaps during live imaging was measured  
635 with *Analyze>Analyze Particles*-Tool, too. Only gaps larger than  $20 \mu\text{m}^2$  were  
636 analyzed. Corrected total cell fluorescence (CTCF) was measured on sum-  
637 projections based on the method established elsewhere<sup>63</sup>.

638

### 639 ***Data processing and quantification of 4D life image stacks***

640 Manual tracking of migrating myotubes was performed using the *spots*-module in the  
641 Imaris 9.3 software. For drift correction, the *reference frame* module was used. The  
642 x-axis was positioned as axis from the genital disc to the testis hub. Excel was used  
643 for all processing and quantification. ***Distance on X*** is defined as the difference  
644 between the x-Values of the same track at t=0 and t=7 h on unprojected and  
645 unsmoothed 3D-data. It was used as a measuring tool instead of speed, as  
646 fluctuations in manual tracking strongly affects velocity especially in slow cells.

647 **Neighbor permanency** is defined as  $\frac{\text{Number of remaining neighbors at } t=7 \text{ h}}{\text{Number of neighbors at } t=0}$ . Neighbors

648 are defined as the 6 closest cells to a given cell at  $t=0$ . A value of 1 means, that all  
649 neighbors were kept.

650 **Smooth data.** As the manual tracking process is fluctuation-prone, we developed a  
651 process, taking this uncertainty into account. The *smoothing* process takes every  
652 spot as the center of a 10  $\mu\text{m}$  circle and finds the track with the smallest angles,  
653 through these areas. The process is reiterated 30 times. Weak phenotypes could  
654 potentially lead to false negative results, but false positive phenotypes get much less  
655 likely. (Summary and Formula in Fig. S3A, Data after processing: Fig. S3B)

656 **Mercator projection.**

657 [1] An approximation of the central axis is performed by splitting the dataset in 10  
658 subsets along the x-axis. In every subset, yz-coordinates of the center point are  
659 approximated by triangulation using the leftmost, rightmost and uppermost points. A  
660 central axis is derived from the point of gravity of the first 5 subsets and the last 5  
661 subsets. Based on that, the x-axis is moved with a rotation matrix. This process gets  
662 reiterated three times. (Summarized in Fig. S3 B-C)

663

664 [2] An yz-vector  $\vec{r}_n$  from every point's respective yz-coordinate to the yz-coordinate of  
665 the central axis is generated. Its magnitude is the radius  $|\vec{r}_n|$  of this point. The  
666 maximal radius of all points is  $|\vec{r}_{max}|$ . The formula of the central angle  $\theta$  depends on  
667 the position of the yz coordinates of every respective point.

668 IF  $y_n < y_{axis}$  AND  $z_n > z_{axis}$   $\theta = 2 * \pi - \cos^{-1} \left( \frac{\vec{r}_n * \begin{pmatrix} 1 \\ 0 \end{pmatrix}}{|\vec{r}_n| * \begin{pmatrix} 1 \\ 0 \end{pmatrix}} \right)$

669 IF  $y_n > y_{axis}$  AND  $z_n > z_{axis}$   $\theta = -\cos^{-1} \left( \frac{\vec{r}_n * \begin{pmatrix} 1 \\ 0 \end{pmatrix}}{|\vec{r}_n| * \begin{pmatrix} 1 \\ 0 \end{pmatrix}} \right)$

670 IF  $z_n < z_{axis}$   $\theta = \cos^{-1} \left( \frac{\vec{r}_n * \begin{pmatrix} 1 \\ 0 \end{pmatrix}}{|\vec{r}_n| * \begin{pmatrix} 1 \\ 0 \end{pmatrix}} \right)$

671 A new y-coordinate is generated using the formula:  $\frac{\pi/2-\theta}{\pi/2} * |\vec{r}_{max}| * \pi/2$

672 (summarized in Fig. S2 C-E).

673

674 [3] To correct the x-axis with respect to  $|\vec{r}_n|$ , all datapoints are sorted by x-coordinate.  
675  $x_n^1$  is the x-coordinate of a given spot before correction.  $x_{n-1}^1$  is the point preceding  
676 this point. Its corresponding point after correction is  $x_n^2$  (Summarized in Fig. S3 E-F).

677 For the very first point the formula is:  $x_1^1 = x_1^2$



678 For all further points :  $x_n^1$ : the formula is  $x_n^2 = x_{n-1}^2 + (x_n^1 - x_{n-1}^1) * \frac{|\overline{r_{max}}|}{|\overline{r_n}|}$

679

680 **Track speed mean** was measured in motility lab using smoothed tracking data, in  
681 order not to quantify manual tracking inaccuracies.

682 **Biased angle to x-axis.** The usual “biased angle” method measures the bias  
683 towards a predefined point. As myotubes do not migrate towards a point, but along a  
684 defined axis, we measured the angle-distribution to the x-axis to analyze myotube  
685 directionality. As angles get strongly affected by speed, this method can only  
686 compare cells with the same “distance on x” value (summarized in Fig. S3 F). Rose  
687 plots were generated in R using the *ggplot2* package.

688 **Meandering distance.** To compare the directionality of samples with different  
689 speeds, their meandering distance  $|\overrightarrow{d_2}|$  was measured according to the following  
690 formula. The median for all tracks on the testis was calculated.  $\overrightarrow{d_1} =$

691 
$$\begin{pmatrix} x_n - x_n \\ y_n - y_{mean\ per\ track} \end{pmatrix} \quad |\overrightarrow{d_2}| = |\overrightarrow{d_1}| * \frac{|\overline{r_n}|}{|\overline{r_{max}}|}$$

692 **Cell-matrix adhesion lifetime** was measured with the *spots* module of the Imaris  
693 3.0 software on 2D maximum projections.

694 **Cell distance over time** between cells isolated by ablation was quantified in R  
695 based on Imaris tracking data using the packages *matlib*, *reshape2*, *tibble* and  
696 *beeswarm*.

697

## 698 **Statistical Analysis**

699 All statistical tests were performed using Prism 7 (GraphPad). Multiple comparisons  
700 were done using parametric or nonparametric Anova, and for single comparisons  
701 welsh’s t-test or Mann-Whitney-test was used. Depending on normal distribution,  
702 assessed with the Shapiro-Wilk test, either parametric or non-parametric tests were  
703 used.

704

## 705 **Image Processing and graphic editing**

706 For image processing and graphic editing, the following software tools were used:  
707 Zen Blue (Zeiss), LasX (Leica), Fiji (ImageJ 1.51), Imaris 9.3 (Bitplane), Inkscape  
708 0.91. R Studio 1.2.5042 (RStudio, Inc.) and packages therein mentioned above. For  
709 displaying cell tracks, Motility lab was used (Miller, unpublished)

710

711 **Computer simulation of testis myoblast behavior.** The software was programmed  
712 using Unity 2019.2.2f1 (Unity Technologies). A single cell in this model (see also  
713 supplementary movie M22) is not simulated as a single agent but consists of multiple  
714 simulated protrusion points (black dots). Their geometrical center (centroid) is  
715 calculated constantly and constitutes the cells “position”. Protrusion points radially  
716 move away from the centroid, mimicking filopodia elongation, but must counter  
717 membrane resistance that gets the higher the farther away the point moves from the  
718 centroid. On its way every protrusion point creates its own “cell-matrix adhesions”  
719 (red dots). They mediate a filopodium (= protrusion points & all its adhesions) static  
720 friction which is needed to counter membrane resistance. If membrane resistance is  
721 higher than adhesion the entire filopodium gets translated towards the centroid.  
722 Protrusion points and cell-matrix adhesions have a lifetime. New protrusion points  
723 are generated in a fixed distance from the centroid (grey circle) where the local  
724 density is lowest to recapitulate our finding that there is no asymmetry in myotube  
725 filopodia assembly. When a protrusion point touches the “adhesion radius” (grey  
726 circle) of another cell it loses its cell-matrix adhesions mimicking the measured  
727 shortened lifetime of real cell-matrix adhesions. The protrusion point is then turned  
728 into an “adhesion point” (green dot) which is recognized by both cells as one of their  
729 protrusion points to calculate their respective centroids. For more details see also  
730 supplementary material.

731

## 732 **Acknowledgements**

733 We thank the Bloomington Stock Center and VDRC for fly stocks. We thank Thomas  
734 Lecuit for providing the Rho1-biosensor. We thank Susanne Önel for providing the  
735 Arp3-GFP transgene. We thank Chi-Hon Lee for providing the flies bearing UAS-N-  
736 cad-EGFP transgene. We thank Christian Klämbt and Jörg Grosshans for helpful  
737 discussion. We thank Caroline Zedler and Franziska Lehne for critical reading of the  
738 manuscript. This work was supported by GRK 2213 graduate school program of the  
739 Deutsche Forschungsgemeinschaft (DFG) to R. R.- P. and S.B.

740

741

## 742 **Figures**

743

744 **Figure 1** *Myotubes form numerous filopodial membrane protrusions instead of*  
745 *lamellipodia and migrate collectively onto the testis*

746

747 **a, b.** Graphics of the *Drosophila* testis at 24h and 33 h after pupae formation (APF).

748 **a.** Myoblasts (mb, red) arising from the genital disc, adhere to the epithelium of the

749 seminal vesicles (sv) and fuse to small syncytia shortly before the connection

750 between seminal vesicles and terminal epithelia (te). **b.** After epithelial fusion nascent

751 myotubes (mt) migrate between the basal lamina separating the testicular cyst cells

752 and a layer of pigment cells (pc) from the testis base towards the apex. **c.** Schematic

753 of the *ex vivo* technique enabling life imaging of *Drosophila* testis development with a

754 spinning disc microscope. **d.** Only one testis of the pair (compare to c) which was

755 prepared is depicted, as in 25x magnification (compare to d) only one testis can be

756 seen. **e.** Wild type testis 33 h APF 350 min in *ex vivo* culture. UAS-LifeAct-EGFP was

757 driven using the *htl-Gal4* driver line, which promotes expression in migrating

758 myotubes (m) and pigment cells (pc). The dashed line in “0 min” represents the area

759 depicted in 100–420 min. Scale bar, 50  $\mu$ m. **f, f’.** Migration of myotubes was tracked

760 using the Imaris software. *mef2-Gal4* was used to drive UAS-LifeAct-EGFP,

761 expressed only in myotubes. **f.** An overlay of microscopic data and track data are

762 shown. Source data are provided as a Source Data file. **f’.** Only track data is shown.

763 Scale bar, 100  $\mu$ m. **e.** Top view of a testis 46 h APF in 420 min *ex vivo* culture. *mef2-*

764 *Gal4* drives UAS-LifeAct-EGFP expression. **g.** Subsequent to migration, testis

765 myotubes start to encircle the testis, generating ring muscles. The testis starts to

766 change its shape. The dashed line in h represents the area depicted in 0/285 min.

767 Scale bar, 100  $\mu$ m. **h.** Confocal image of an adult testis stained with phalloidin and

768 DAPI. Due to constriction by building muscles in pupal development, the testis

769 gained its typical coiled shape<sup>30</sup> Scale bar, 100  $\mu$ m; close-up in **h’**. **i.** Close-up of

770 myotubes at the front edge of the migrating sheet 60 min in *ex vivo* culture. *mef2-*

771 *Gal4* drives UAS-LifeAct-EGFP expression. Cells at the front of the migrating cluster

772 appear like the cells within the cluster depicted in h, as they project filopodia-like

773 structures in all directions. The actin cytoskeleton appears in stress fiber-like thick

774 bundles. Scale bar 10  $\mu$ m. **j.** Close-up of two myotubes during migration 60 min in *ex*

775 *vivo* culture. *beatVC-Gal4* promotes expression of UAS-LifeAct-EGFP and UAS-

776 GFP-nls in a mosaic fashion, allowing for the analysis of single cells within the

777 migrating sheet. Nuclei of neighboring cells are marked by yellow asterisks. Even

778 cells within the cluster, enwrapped by neighboring cells, appear to have filopodia-like

779 protrusions and a general mesenchymal phenotype. Scale bar, 20  $\mu$ m. **l.**

780 Quantification of filopodia number per cell edge length in cells at the migration front.  
781 Source data are provided as a Source Data file. Directionality of filopodia of cells was  
782 quantified by measuring the orientation angle as illustrated in **m** and **m'**.  
783 Quantification revealed no strong bias in filopodia direction neither of cells **n**. within  
784 the myotube cluster nor **o**. of cells at the migration front. Source data are provided as  
785 a Source Data file.

786

787

788 **Figure 2 Formins are essential in myotube collective migration and filopodia**  
789 **dynamics, but not the Arp 2/3 complex.**

790

791 **a.** Migration tracks of testis myotubes 33 h APF in 420 min *ex vivo* culture, treated  
792 with DMSO as a control. Source data are provided as a Source Data file. **b, c.** CK666  
793 (100  $\mu$ M) treatment of a testis 33 h APF in 420 min *ex vivo* culture. Upon Arp2/3  
794 complex activity inhibition, migration is reduced. Especially cells at the testis base  
795 appear to be affected. *mef2-Gal4* drives UAS-LifeAct-EGFP and UAS-mCD8-RFP  
796 expression. **b.** Migration tracks of testis myotubes upon CK666 treatment. Source  
797 data are provided as a Source Data file. **c.** Life imaging micrographs. mCD8-RFP in  
798 green and LifeAct-EGFP in white. The dashed line in **c** represents the area depicted  
799 in 0-420 min. Scale bar, 50  $\mu$ m. **d, e.** Migration is also mildly reduced by *arp3* RNAi.  
800 *mef2-Gal4* drives UAS-LifeAct-EGFP, UAS-mCD8-RFP and the RNAi construct *UAS-*  
801 *arp3*<sup>KK102278</sup> (Vienna v108951). **d.** Migration tracks of testis myotubes upon *arp3*  
802 RNAi. **e, e'**. Life imaging micrograph. Source data are provided as a Source Data file.  
803 mCD8-RFP (green) is depicted in **e**. (Note: mononucleated myotubes marked by co-  
804 expression of the mCD8-RFP marker excluded from the nuclei). Overlay with LifeAct-  
805 EGFP (white) in **e'**. The dashed line in **e'** represents the area depicted in 0-350 min.  
806 Scale bar, 50  $\mu$ m. **f, g.** Upon Formin suppression through SMIFH2 (10  $\mu$ M)  
807 treatment, migration is completely disrupted. *mef2-Gal4* drives UAS-LifeAct-EGFP  
808 and UAS-mcd8-RFP expression. **f.** Migration tracks of testis myotubes upon SMIFH2  
809 treatment. Source data are provided as a Source Data file. **g, g'**. Life imaging  
810 micrographs. mCD8-RFP (green) is depicted in **g**. Overlay with LifeAct-EGFP (white)  
811 in **g'**. The dashed line in **g'** represents the area depicted in 0-350 min. Scale bar, 50  
812  $\mu$ m. **h.** Quantification total migration distance along x-axis. Source data are provided  
813 as a Source Data file. **i-k.** Close ups of front-row myotubes upon different treatments.  
814 **i.** Upon DMSO treatment, cell morphology and filopodia composition were not

815 affected. **j.** Arp2/3 suppression by CK666 treatment leads to mild defects. No  
816 branched filopodia are built, the overall morphology is unaffected. **k.** Formin  
817 suppression by SMIFH treatment leads to strong morphological defects. Cells are  
818 contracted, filopodia generate more branches. **l.** CK666 in addition to SMIFH2 co-  
819 treatment leads to a loss of branched filopodia. Cells are contracted even stronger.

820

821 **Figure 3** *Migrating myotubes form stable cell-matrix adhesions at their free edge and*  
822 *adherens junctions at their cell-cell edge*

823

824

825 **a, b.** Close ups of front-row myotubes **a.** wild type and **b.** *arp3* knock-down marked  
826 by Lifeact-EGFP expression. Scale bar, 10  $\mu$ m. **c.** Quantification of filopodia tip  
827 number per cell edge length. Source data are provided as a Source Data file. **d.**  
828 Spinning disc microscopy still images of a front-row myotube expressing an Arp3-  
829 EGFP transgene. The arrowheads mark positions where Arp3 is enriched at  
830 filopodial branch points. Scale bar, 10  $\mu$ m. **e.** Spinning disc microscopy still images of  
831 a front-row myotube co-expressing Arp3-EGFP and Myr-RFP. The arrowhead marks  
832 a position of Arp3 at a distinct filopodial branch. Scale bar, 10  $\mu$ m. **f, g.** Close-up of  
833 myotubes at the front edge of the migrating sheet, 6 min in *ex vivo* culture. Cell-  
834 matrix adhesions (green) are assembled in the shafts of free edge-filopodia.  
835 Filopodia elongate, generating new adhesions in a beaded string-like manner. Scale  
836 bar: 10  $\mu$ m. **g.** Some filopodia build branches. UAS-FAT-EGFP (cell-matrix adhesion  
837 marker and UAS-Myr-RFP was driven by *mef2-Gal4*. Scale bar: 10  $\mu$ m. **h, h', h''.**  
838 FAT-EGFP and LifeAct-RFP were driven by *mef2-Gal4*. **h.** Dashed lines represent  
839 the area magnified in **h'** and **h''**. **h'.** Matrix adhesions are found at filopodia tips (white  
840 arrowheads) and appear enriched at the free edge of cells in contrast to their cell-cell  
841 edges. Thick actin cables are marked by yellow arrowheads. **h''.** Cell-matrix  
842 adhesions colocalize with bundled actin fibers (white arrowheads). **h', h''.** Scale bar,  
843 10  $\mu$ m. **i, j, k.** Quantification revealed **i.** a significant bias in directionality of cell-matrix  
844 adhesions, **j.** an increased number of cell-matrix adhesions at the cell front (pointing  
845 to the testis apex) and **k.** an increased number of cell-matrix adhesions at the free-  
846 edge compared to cell-cell edges (excluding free edge regions with prominent actin  
847 filament bundles marked as “actin cables” in blue) as illustrated. Source data are  
848 provided as a Source Data file. **l, m.** Cell-matrix adhesions in nascent myotubes  
849 during migration. FAT-EGFP was driven by *mef2-Gal4*. Quantified matrix adhesions  
850 at the free edge are depicted in red and at the cell-cell edge in green. Scale bar: 10

851  $\mu\text{m}$ . **I**. Front edge of the migrating sheet. **I'**. Magnification at 0 min. **J**'. Magnification  
852 at 40 min. **m**. Following cells in the same sheet as in H. **m'**. Magnification at 0 min.  
853 **m''**. Magnification at 40 min. **n**. The quantification revealed that cell-matrix adhesions  
854 longevity is significantly higher at the "free edge" compared to the "cell-cell-edge".  
855  $n=3$  testes. Source data are provided as a Source Data file. **o**. Cell-matrix adhesions  
856 in myotubes in the middle of the migrating sheet 33 h APF in *ex vivo* culture before  
857 and after laser ablation. *mef2-Gal4* drives UAS-FAT-EGFP expression. Before  
858 ablation only few and scattered cell-matrix adhesions can be observed in "follower"  
859 myotubes. After laser ablation, cells adjacent to the ablation site start to generate  
860 cell-matrix adhesion containing protrusions along the newly arose free edge  
861 (arrowhead). Scale bar: 10  $\mu\text{m}$ .

862 **Figure 4** *Reduced N-cadherin expression increases free edge, promoting cell-*  
863 *independent behavior at the expense of collective directionality*  
864

865 **a-f**. Confocal images of a wild type 33 h APF testis stained with an anti-N-cadherin  
866 antibody. F-Actin was stained using Phalloidin and nuclei were marked with DAPI. **a**.  
867 Overview of the testis base. The areas marked with dashed lines are magnified in B,  
868 C and E, F, respectively. Scale bar: 50  $\mu\text{m}$ . **b**. On the genital disc adjacent to the  
869 testis base, nascent myotubes appear epithelial with N-cadherin localized evenly  
870 along the cell edge. **c, c'**. In contrast, at the front edge of the migrating sheet, N-  
871 cadherin localized in foci at the tip of filopodia-like structures interconnecting cells  
872 (white arrowhead). **d, e, e'**. The same is true for cells within the sheet. **f, f'**. In rare  
873 cases, completely isolated cells could be observed. No N-cadherin staining can be  
874 detected in such cells. **b, c, e, f**. scale bar: 10  $\mu\text{m}$ . **g**. Spinning disc microscopy still  
875 images of myotubes expressing a Ncad-EGFP transgene. The arrowheads mark  
876 positions where Ncad-EGFP is enriched at cell-cell junctions. Scale bar, 10  $\mu\text{m}$ . **h, i**.  
877 *mef2-Gal4* was used to drive expression of UAS-LifeAct-EGFP and UAS-Ncad-RNAi  
878 construct. **h**. Wild type (WT) testis 33 h APF in *ex vivo* culture. *mef2-Gal4* drives  
879 expression of UAS-LifeAct-EGFP. Overview at  $t = 0$  min at the left side. Scale bar: 50  
880  $\mu\text{m}$ . Time steps from 0 min to 45 min in *ex vivo* culture at the right side. Scale bar: 20  
881  $\mu\text{m}$ . **h'**. Migration tracks of WT myoblasts. Source data are provided as a Source  
882 Data file. **i**. *n-cadherin* knock down in myotubes. Compare to A. Single cells are not  
883 as strongly attached to each other. Myotubes are sometimes completely isolated as  
884 in WT (yellow asterisk) ( $t = 0$  min, 45-60 min). **i'**. Migrations tracks upon knock down  
885 of *N-cadherin*. Source data are provided as a Source Data file. **j, k**. 18 min life culture



886 demonstrates that an increased free edge in every single cell (yellow asterisk)  
887 through N-cad RNAi results in more cell-matrix adhesion-producing filopodia. The  
888 arrowhead marks a retracting protrusion. UAS-FAT-EGFP and *UAS-Ncad* RNAi was  
889 driven by *mef2-Gal4*. Scale bar: 20  $\mu\text{m}$ . **l**, **m**. Quantification with Fiji. Graphical  
890 representation of the values is depicted. A ROI of the same size of 8 stills of each  
891 respective genotype was compared with Fiji Particle Analysis after conversion to  
892 black-and-white pictures (see also supplementary figure S2B, C). **l**. The number of  
893 gaps between cells is significantly increased. **m**. As proxy for free edge, we used the  
894 perimeter of the white-to-black edge. Cell free edge is significantly increased in *N-*  
895 *cad* RNAi animals. Source data are provided as a Source Data file. **n**. Neighbour-  
896 permanency is significantly reduced when N-cadherin is knocked down (using two  
897 independent RNAi transgenes). Source data are provided as a Source Data file. **o**.  
898 To assess, how far cells were able to migrate on the testis, the difference of x values  
899 (x-axis = defined as the axis from base to apex) of testis myotubes at  $t = 0$  min and  $t =$   
900 420 min was calculated. The mean of each testis was compared. Upon N-Cadherin  
901 reduction, myotubes come as far as in WT. Source data are provided as a Source  
902 Data file. **p**. As a tool for directionality, biased angle in regard to the testis axis was  
903 measured. Datasets were smoothed and Mercator-projected before (see also  
904 supplementary figure S3). The mean angle (0-180°) of every track is blotted. N-  
905 Cadherin reduction causes myotubes to migrate less directional. The same is true  
906 using a second RNAi line. Source data are provided as a Source Data file. **q**.  
907 Quantification of track speed mean in  $\mu\text{m}/\text{sec}$ . RNAi line #1 is subject to wider  
908 fluctuation but not significantly faster. RNAi line #2 is significantly faster than wild  
909 type (WT). Source data are provided as a Source Data file.

910

911 **Figure 5** *Migrating myotubes need cell-cell contact to achieve directionality.*

912

913 **a-g**. Isolation of a single nascent myotube by laser ablation. **a**. Overview of a testis  
914 after laser ablation (33 h APF). *htl-Gal4* drives UAS-LifeAct-EGFP expression. Scale  
915 bar, 100  $\mu\text{m}$ . **b**. Close-up on the ablation site. **c**. Same site as in b, before ablation.  
916 Scale bar in c and c': 20  $\mu\text{m}$ . The dashed line represents the area affected by laser  
917 ablation. **c'**. Behavior of the isolated cell from B after ablation. The isolated cell  
918 (yellow asterisk) shows no forward motion if it has no contact to adjacent cells (upper  
919 row). After contact is established, it moves along in the migrating sheet (bottom row).

920 **d, e.** To quantify the directionality of the isolated cell, cell motion was tracked using  
921 the Imaris software. The isolated cell before contacting to the migrating sheet is  
922 depicted in red, after contacting it is depicted in green. As a control, adjacent cells  
923 were tracked. They are showed in blue. Source data are provided as a Source Data  
924 file. **f, g.** As a measurement tool, we used the biased angle to x-axis. The mean  
925 angle (0-180°) of every track is blotted. When isolated, cells lose their directionality,  
926 but regain it after establishing contact to adjacent cells. The color code is the same  
927 as in **e, f**. n= 5 testes. Source data are provided as a Source Data file. **h-j.** Isolation  
928 of two adjacent myotubes by laser ablation. **h.** Overview of a testis after laser  
929 ablation (33 h APF). *htl-Gal4* drives LifeAct-EGFP (grey) and Myr-RFP (magenta)  
930 expression. The dashed line represents the area affected by laser ablation. Scale  
931 bar, 100 µm. **h'.** Behavior of the two isolated myotubes from h. after ablation. Scale  
932 bar in c and c': 20 µm. **i.** Rose plot shows the distribution of the biased angle to x-  
933 axis. Source data are provided as a Source Data file. **j.** Measurement of the distance  
934 between two myotubes over time. Source data are provided as a Source Data file.

935  
936  
937  
938

**Figure 6** *Rac2 and Cdc42 regulate filopodia matrix adhesion to enable myotube collective migration*

939 **a, c, i, j.** *rac2* knockdown was induced by expression of the *UAS-rac2*<sup>NIG.8556R</sup> RNAi  
940 transgene together with UAS-LifeAct-EGFP, using *mef2-Gal4*. **a.** *rac2* knockdown in  
941 myotubes on testis 33 h APF in *ex vivo* culture. Myotube migration almost completely  
942 ceases. Tracks are depicted in D. The dashed line in “0 min” represents the area  
943 depicted in 50–420 min. Scale bar: 50 µm. Source data are provided as a Source  
944 Data file. **b, d, i, j.** *cdc42* knockdown was induced by expression of the *UAS-*  
945 *cdc42*<sup>TRIP.JF02855</sup> (#1) or the *UAS-cdc42*<sup>KK108698</sup> (#2) RNAi transgenes, together with  
946 UAS-LifeAct-EGFP, using *mef2-Gal4*. Source data are provided as a Source Data  
947 file. **b.** *cdc42* knock down in myotubes on testis 33 h APF in *ex vivo* culture. Myotube  
948 migration is disrupted. Cells change their shape, generating massive filopodia-like  
949 structures, in comparison to WT. Tracks are depicted in **e**. The dashed line in “0 min”  
950 represents the area depicted in 50–420 min. Scale bar: 50 µm. Source data are  
951 provided as a Source Data file. **f-h.** Close-up of myotubes 33 h APF in *ex vivo* culture  
952 with corresponding color-coded projection in **f'-h'**. Scale bar: 10 µm. **f, f'.** Wild type  
953 (WT) myotubes. **g, g'.** *rac2* RNAi causes a fast assembly and disassembly of  
954 filopodia. **h, h'.** *cdc42* RNAi leads to very stable filopodia in comparison to wt.



955 Filopodia are prolonged, even between nascent myotubes, rendering close cell-cell  
956 contact harder to achieve, thus the entire sheet appears less dense as in WT. **i.**  
957 Quantification of migration distance on x-axis (compare to Fig 3J). Source data are  
958 provided as a Source Data file. **j.** Quantification of median meandering distance.  
959 Source data are provided as a Source Data file. **k.** Cell-matrix adhesions in myotubes  
960 during migration. UAS-FAT-EGFP was driven by *mef2-Gal4*. Scale bar: 10  $\mu$ m. **l.**  
961 Cell-matrix adhesions are completely lost upon *rac2* suppression by RNAi. **m.** Cell-  
962 matrix adhesions remain much longer upon *cdc42* reduction, even reaching the  
963 trailing end of a migrating cell. **n.** Quantification of cell-matrix adhesion lifetime. As  
964 shown in H, a cell-cell edge cannot be clearly defined upon knock down of *cdc42*,  
965 thus just the free edge was compared. *cdc42* reduction increased lifetime of cell-  
966 matrix adhesions significantly, compared to WT, n = 3 testes for WT and *cdc42* RNAi.  
967 Source data are provided as a Source Data file.

968 **Figure 7** *Rho/Rok-driven actomyosin contractility is essential for myotube migration.*  
969

970 **a, b.** Close-ups of myotubes at the front edge of the migrating sheet 30 min in *ex vivo*  
971 culture. *mef2-Gal4* drives UAS-LifeAct-RFP and the Rho1 sensor Anillin-RBD-EGFP.  
972 UAS-LifeAct-RFP is enriched along the membrane in actin cables. To depict all actin  
973 structures, gamma was set on 0.09. In the boxes in the upper right corner, details  
974 with gamma=1 are depicted. **a.** Rho1-Sensor activity is found in free edge filopodia  
975 (white arrowheads, as LifeAct-RFP rapidly bleached out in filopodia tips, EGFP signal  
976 appears partially outside the cell). When analyzed with gamma=1, it becomes clear  
977 that Rho1-sensor is only present at parts of the edge containing actin cables. After  
978 the Rho signal appears, the corresponding part of the cell retracts, and the Rho1  
979 signal immediately disappears. During retraction, the LifeAct-RFP signal at the  
980 retractive site goes back to normal intensity. **b.** Rho1 sensor activity does not seem  
981 to mark rear polarity. Filopodia can protrude (left column, yellow line, then activate  
982 RhoA and retract (middle column, yellow line). Subsequently, neighboring filopodia  
983 can elongate again (middle and left column, yellow line). **c.** myotubes expressing  
984 LifeAct-EGFP on testis 33 h APF in *ex vivo* culture treated with the Rok inhibitor Y-  
985 27632. **d.** *sqh* knockdown was induced by expression of the *UAS-sqh* RNAi  
986 transgene together with UAS-LifeAct-EGFP using *mef2-Gal4*. Myotube cell cluster  
987 were still able migrate with reduced speed and become dramatically elongated with  
988 long interconnecting cell processes. The dashed line in “0 min” represents the area  
989 depicted in 50–420 min. Scale bar: 50  $\mu$ m. Tracks are depicted in **e.** wild type (WT),

990 **f.** Y-27632 treatment and **g.** *sqh* knockdown. Source data are provided as a Source  
991 Data file. **h.** Measurement of the gap size within cell cluster over time. Source data  
992 are provided as a Source Data file. **i.** Quantification of migration distance on x-axis.  
993 Source data are provided as a Source Data file. **j.** Quantification of the median  
994 meandering distance. Source data are provided as a Source Data file. **k, l.** Confocal  
995 images of adult testes expressing **k.** a *sqh* RNAi transgene **l.** a *zip* RNAi transgene  
996 under the *mef2-Gal4* driver, the muscle sheet is stained with phalloidin (red) and  
997 nuclei are stained with DAPI (cyan). Scale bar: 100  $\mu$ m.

998

### 999 **Figure 8** Proposed model

1000 **a.** Comparison between filopodia-based and lamellipodia-based cell migration.  
1001 Lamellipodia-based migration requires the Arp2/3 complex generating branched actin  
1002 filament networks that serve as the major engine to push the leading edge forward,  
1003 whereas filopodia support mesenchymal migration by promoting cell-matrix  
1004 adhesiveness at the leading edge stabilizing the advancing lamellipodium or by  
1005 sensing the environment. In filopodia-based migration, it seems that filopodia replace  
1006 the lamellipodium as the motor of motility. We assume that polymerization of bundled  
1007 actin filaments through formins pushes parts of the membrane. Arp2/3 complex  
1008 contributes to filopodia branching and thereby provides new barbed ends generating  
1009 new filopodia. **b.** Key features and cell behavior in testis myotube migration  
1010 compared to **c.** migrating mesenchymal neural crest cells undergoing CIL. Different  
1011 from neural crest cells, myotubes did not migrate as loose cohorts, but maintain  
1012 cohesiveness. Unlike neural crest cells, migrating myotubes are not simply polarized  
1013 along a front-rear axis and do not form a contact-dependent intracellular Rho  
1014 gradient that initiates cell polarization driving directed cell migration. In myotube  
1015 migration, a contact-dependent asymmetry of cell-matrix adhesion rather acts as a  
1016 major switch to drive locomotion towards the free space. Individually or loosely  
1017 connected migrating cells, like neural crests cells are able to migrate persistently due  
1018 to classical front-rear polarity. By contrast, testis myotubes rely on constant cohesion  
1019 to break symmetry. Supracellular contractile actin cables contribute to the integrity of  
1020 the migrating cell cluster and thereby to cohesion.

1021

### 1022 **Supplementary material**

1023

### 1024 **Supplementary figures**

1025

1026 **Figure S1**

1027 **a.** Graphical representation of types of adult testis defects as a consequence of  
1028 partial loss of adhesion or migration. **b-l.** Adult testes with different genetic  
1029 backgrounds. Upper left corner: light micrograph of several testis showing the  
1030 phenotypic range, upper right corner: light micrograph of a single testis. Bottom:  
1031 confocal image of a testis. muscle sheet stained with phalloidin (red) and nuclei  
1032 stained with DAPI (cyan). **b.** Wild type adult testis with a curled shape and an  
1033 organized and entirely closed muscle sheet. **c, d.** Expression of a *N-cad* RNAi  
1034 transgene #1 driven by *mef2-Gal4* leads to small holes in the muscle sheet in a dose  
1035 dependent-manner<sup>30</sup>. **c.** one copy of the RNAi transgene #1; **d.** two copies of the  
1036 same RNAi transgene #1. **e.** Expression of a stronger *N-cad* RNAi transgene #2  
1037 causes much stronger defects with large holes within the muscle sheet (yellow  
1038 arrowheads). **f.** *rac2* RNAi driven by *mef2-Gal4* leads to strong migration defects with  
1039 a strongly dilated tip, partially uncovered, partially covered in disorganized muscles.  
1040 **g.** *cdc42* RNAi driven by *mef2-Gal4*, resembles *rac2* RNAi with slightly milder  
1041 defects. **h, i, j.** *arp3*, *wave* and *sra-1* RNAi driven by *mef2-Gal4*, leads to mild  
1042 migration defects with a slightly dilated tip and small uncovered areas. **k.** *rho1* RNAi  
1043 driven by *lbe-Gal4*. Even using a weak driver line, prominent migration defects can  
1044 be observed. **l.** *Ncad2* RNAi driven by *mef2-Gal4* resembles wild type testis without  
1045 any defects. **m, n.** Confocal images of FAT-GFP driven by *mef2-Gal4* in larval body  
1046 wall muscles 6/7. Muscle attachment sites, marked by FAT-GFP are not affected by  
1047 *rac2* RNAi, indicating that *rac2* depletion has no general impact on matrix adhesion  
1048 or integrin expression, but specifically affects cell-matrix adhesions in migratory cells.  
1049 Using sibling flies, no cell-matrix adhesions can be detected in migrating myoblasts.

1050

1051 **Figure S2**

1052 **a.** Graphical representation of the expression patterns of the Gal4 driver lines used  
1053 (in green). Compare to Fig. 1B. **b, c.** Overview and ROI's (120 x 220 px) in WT (B)  
1054 and *N-cad* RNAi (C) on which quantification in D/E and Fig. 3E, F is based. Marked  
1055 with yellow dashed lines in the overview. **d.** Cell number inside ROI's. Cell number is  
1056 not affected upon *N-cad* RNAi. Source data are provided as a Source Data file. **e.**  
1057 Area per cell inside ROI's. Cell Area is not affected upon *N-cad* RNAi. Source data  
1058 are provided as a Source Data file. **f, g, h, i.** Comparison of neighbor permanency

1059 (f.), distance on x-axis (g.), directionality based on biased angle (H) and based on  
1060 meandering distance (I), for all genotypes. For every genotype, all trackable cells on  
1061 5 testes were analyzed. The number of tracks for every genotype equals the number  
1062 of data points in h. Source data are provided as a Source Data file. **i, j.** Confocal  
1063 images of adult testis muscle sheet stained with a specific anti-NCad antibody  
1064 (green), phalloidin (red) and DAPI (blue). **i.** In wildtype (WT) Ncadherin localizes  
1065 along the cell-cell junction. **j.** Expression of a *ncad* RNAi transgene strongly reduce  
1066 anti-NCad immunostaining as quantified in **k.** for two independent RNAi transgenes.  
1067 Source data are provided as a Source Data file.

1068

### 1069 **Figure S3**

1070 Myotubes migrate on the surface of an ellipsoid, thus on a two-dimensional surface,  
1071 that is curved in space. This curvature did not allow to apply mathematical rules  
1072 based in flat geometry. 3D migration tools do not consider the limitations of the  
1073 surface, to which myotubes are bound but assume they can move freely. Instead, we  
1074 developed a Mercator projection-based process, which allows for high angle-  
1075 accuracy but neglects distances. **a.-f.** Steps of Mercator projection are shown (see  
1076 material and methods for details). Source data are provided as a Source Data file.

1077

### 1078 **Supplementary table 1**

1079

1080 A list of the RNAi transgenes used in this study, and phenotypic strength using  
1081 different Gal4 driver lines.

1082

### 1083 **Supplementary methods** (simulation model)

1084

1085 Description of the simulation model and details on mathematical modeling.

1086

1087

### 1088 **Supplementary movies**

1089

#### 1090 *Supplementary movie M1*

1091 Spinning disc microscopy time-lapse movie of *ex vivo* cultured wild type testes (33h  
1092 APF) expressing (left) LifeAct-EGFP in myotubes and pigment cells using the htl-  
1093 Gal4 driver, (middle) LifeAct-EGFP only in myotubes using the *mef2*-Gal4 driver, and  
1094 (right) LifeAct-RFP and a nuclear EGFP in myotubes and pigment cells using the htl-  
1095 Gal4 driver. Scale bar: 50µm.

1096

1097 *Supplementary movie M2*

1098 Spinning disc microscopy time-lapse movie of an *ex vivo* cultured wild type testis  
1099 (33h APF) expressing a LifeAct-EGFP transgene using the *mef2-Gal4* driver. The  
1100 migration of myotubes was tracked using the Imaris software. An overlay of  
1101 microscopic data and track data are shown. Scale bar: 30µm.

1102

1103 *Supplementary movie M3*

1104 Spinning disc microscopy time-lapse movie of migrating myotubes (marked by  
1105 LifeAct-EGFP expression) at the front edge of the migrating sheet 60 min in *ex vivo*  
1106 culture. Scale bar 10 µm.

1107

1108 *Supplementary movie M4*

1109 Spinning disc microscopy time-lapse movie of migrating myotubes expressing  
1110 LifeAct-EGFP and a nuclear EGFP in a mosaic fashion 60 min in *ex vivo* culture,  
1111 allowing for the analysis of single cells within the migrating sheet. Scale bar 30 µm.

1112

1113 *Supplementary movie M5*

1114 Spinning disc microscopy time-lapse movie of an *ex vivo* cultured testis (33h APF)  
1115 expressing a LifeAct-EGFP transgene, treated with 100 µM CK666. Upon Arp2/3  
1116 complex activity inhibition, migration is reduced. Especially cells at the testis base  
1117 appear to be affected. Scale bar: 50 µm.

1118

1119 *Supplementary movie M6*

1120 Spinning disc microscopy time-lapse movie of an *ex vivo* cultured testis (33h APF)  
1121 co-expressing an *arp3* RNAi together with a LifeAct-EGFP transgene in all myotubes  
1122 using the *mef2-Gal4* driver. Migration is also mildly reduced by *arp3* RNAi. Scale bar:  
1123 50µm.

1124

1125 *Supplementary movie M7*

1126 Spinning disc microscopy time-lapse movie of an *ex vivo* cultured testis (33h APF)  
1127 expressing a LifeAct-EGFP transgene, treated with 10 µM SMIFH2. Myotube  
1128 migration is completely suppressed. Scale bar: 50µm.

1129

1130 *Supplementary movie M8*

1131 Spinning disc microscopy time-lapse movie of migrating myotubes expressing the  
1132 cell-matrix adhesion reporter FAT-EGFP and a membrane marker Myr-RFP. Scale  
1133 bar: 10  $\mu\text{m}$ .

1134

1135 *Supplementary movie M9*

1136 Spinning disc microscopy time-lapse movie of migrating myotubes expressing the  
1137 cell-matrix adhesion reporter FAT-EGFP tracked using the Imaris software.  
1138 Quantified cell-matrix adhesions at the free edge are depicted in red and at the cell-  
1139 cell edge in green. Scale bar: 20  $\mu\text{m}$ .

1140

1141 *Supplementary movie M10*

1142 Spinning disc microscopy time-lapse movie of migrating myotubes expressing the  
1143 cell-matrix adhesion reporter FAT-EGFP in the middle of the migrating sheet 33 h  
1144 APF in *ex vivo* culture before and after laser ablation (position is marked by an  
1145 asterisk). Scale bar: 10  $\mu\text{m}$ .

1146

1147 *Supplementary movie M11*

1148 Spinning disc microscopy time-lapse movie of migrating myotubes co-expressing  
1149 NCad-EGFP and LifeAct-RFP in the middle of the migrating sheet 33 h APF in *ex*  
1150 *vivo* culture. Scale bar: 10  $\mu\text{m}$ .

1151

1152 *Supplementary movie M12*

1153 Spinning disc microscopy time-lapse movie of *ex vivo* cultured (left) wild type testes  
1154 compared to (right) testis expressing an *N-cad* RNAi transgene. Myotubes are  
1155 marked by LifeAct-EGFP transgene expression in all myotubes using the *mef2-Gal4*  
1156 driver. Scale bar: 50 $\mu\text{m}$ .

1157

1158 *Supplementary movie M13*

1159 Spinning disc microscopy time-lapse movies of migrating wildtype myotubes (left)  
1160 compared to myotubes depleted of N-cadherin (right) visualized by the cell-matrix  
1161 adhesion reporter FAT-EGFP. Scale bar: 10  $\mu\text{m}$ .

1162

1163 *Supplementary movie M13*

1164 Spinning disc microscopy time-lapse movie of an *ex vivo* cultured testis (33h APF)  
1165 co-expressing a *rac2* RNAi together with a LifeAct-EGFP transgene in all myotubes  
1166 using the *mef2-Gal4* driver. Myotube migration is almost completely disrupted. Scale  
1167 bar: 50µm.

1168

1169 *Supplementary movie M14*

1170 Spinning disc microscopy time-lapse movie of *ex vivo* cultured wild type testis (33h  
1171 APF) expressing LifeAct-EGFP using the *htl-Gal4* driver. The isolated single myotube  
1172 by laser ablation is marked by an asterisk. Scale bar 100 µm.

1173

1174 *Supplementary movie M15*

1175 Spinning disc microscopy time-lapse movie of *ex vivo* cultured wild type testis (33h  
1176 APF) expressing LifeAct-EGFP using the *htl-Gal4* driver. The isolated myotube pair  
1177 by laser ablation is marked by an asterisk. Scale bar 100 µm.

1178

1179 *Supplementary movie M16*

1180 Spinning disc microscopy time-lapse movie of an *ex vivo* cultured testis (33h APF)  
1181 co-expressing a *rac2* RNAi together with a LifeAct-EGFP transgene in all myotubes  
1182 using the *mef2-Gal4* driver. Myotube migration is almost completely disrupted. Scale  
1183 bar: 50µm.

1184

1185 *Supplementary movie M17*

1186 Spinning disc microscopy time-lapse movie of an *ex vivo* cultured (left) wild type  
1187 testis compared to (right) testis expressing a *cdc42* RNAi transgene. Migration is  
1188 strongly affected by *cdc42* RNAi. Cells change their shape, generating massive  
1189 filopodia-like structures, in comparison to WT Scale bar: 50µm.

1190

1191 *Supplementary movie M18*

1192 Spinning disc microscopy time-lapse movies of (right) wild type myotubes, (middle)  
1193 *rac2* depleted myotubes and (right) *cdc42* depleted myotubes together with a LifeAct-  
1194 EGFP transgene, 40 min in *ex vivo* culture. Scale bar 20 µm.

1195

1196 *Supplementary movie M19*



1197 Spinning disc microscopy time-lapse movies of (right) wild type myotubes, (middle)  
1198 *rac2* depleted myotubes and (right) *cdc42* depleted myotubes marked by the cell-  
1199 matrix adhesion reporter FAT-EGFP, 40 min in *ex vivo* culture. Scale bar 20  $\mu\text{m}$ .

1200

1201

1202

1203 *Supplementary movie M20*

1204 Spinning disc microscopy time-lapse movie of migrating myotubes co-expressing the  
1205 Rho1 activity reporter and LifeAct-RFP to visualize protrusion dynamics. Rho-Sensor  
1206 activity is found in retracting free edge filopodia (yellow arrowheads). Note that the  
1207 ubiquitously expressed Rho1 sensor also marks ring canals in  
1208 the *Drosophila* germline cyst (white arrowheads). Scale bar: 10  $\mu\text{m}$ .

1209 *Supplementary movie M21*

1210 Spinning disc microscopy time-lapse movies of *ex vivo* cultured (from left to right)  
1211 testis treated with (A) the Rok inhibitor (Y27632), (B) treated with the blebbistatin,  
1212 expressing a (C) *sqh* and (D) *zip* RNAi transgene. Migration is strongly affected.  
1213 Scale bar: 50  $\mu\text{m}$ .

1214

1215 *Supplementary movie M22*

1216 Computer simulation model. Cells were positioned at one end of a confinement  
1217 roughly mimicking the unfolded testis surface. **(A)** If cells behave according to the  
1218 default setting, meaning that just adhesion but not filopodia lifetime is affected by  
1219 contact, then all free space gets covered while cells keep their cohesion. **(B)** Isolated  
1220 cells keep their cohesion as well, but randomly migrate, until they are contacted by  
1221 the expanding sheet. After contact, they move along, as part of the sheet. **(C)** When  
1222 filopodia disassemble shortly after contact, the behaviour resembles CIL, as there is  
1223 a short phase of protrusion asymmetry, shifting the centroids apart from each other.  
1224 Shortly after contact the repulsive motion ceases, as new filopodia emerge, until  
1225 another cell moves close. All space gets covered, but there is no cohesion between  
1226 cells. (A-C) In all scenarios a clumping of cells can be observed at the testis base. It  
1227 seems to be a consequence of the interaction with the barrier which has no  
1228 counterpart in a three dimensional limitless but finite surface. It is thereby an artefact  
1229 with no meaning for the simulation (for more details about the simulation see  
1230 supplementary material).



1231

1232

1233 **References**

1234 1 Scarpa, E. & Mayor, R. Collective cell migration in development. *J Cell Biol*  
1235 **212**, 143-155, doi:10.1083/jcb.201508047 (2016).

1236 2 Friedl, P. & Mayor, R. Tuning Collective Cell Migration by Cell-Cell Junction  
1237 Regulation. *Cold Spring Harb Perspect Biol* **9**, doi:10.1101/cshperspect.a029199  
1238 (2017).

1239 3 Ridley, A. J. Rho GTPase signalling in cell migration. *Curr Opin Cell Biol* **36**,  
1240 103-112, doi:10.1016/j.ceb.2015.08.005 (2015).

1241 4 Schaks, M., Giannone, G. & Rottner, K. Actin dynamics in cell migration.  
1242 *Essays Biochem* **63**, 483-495, doi:10.1042/EBC20190015 (2019).

1243 5 Mayor, R. Collective Cell Migration: Wisdom of the Crowds Transforms a  
1244 Negative Cue into a Positive One. *Current Biology* **29**, R205-R207 (2019).

1245 6 Mayor, R. & Etienne-Manneville, S. The front and rear of collective cell  
1246 migration. *Nat Rev Mol Cell Biol* **17**, 97-109, doi:10.1038/nrm.2015.14 (2016).

1247 7 Yamada, K. M. & Sixt, M. Mechanisms of 3D cell migration. *Nat Rev Mol Cell*  
1248 *Biol*, doi:10.1038/s41580-019-0172-9 (2019).

1249 8 Abercrombie, M. & Heaysman, J. E. M. Observations on the Social Behaviour  
1250 of Cells in Tissue Culture .1. Speed of Movement of Chick Heart Fibroblasts in  
1251 Relation to Their Mutual Contacts. *Exp Cell Res* **5**, 111-131 (1953).

1252 9 Abercrombie, M. & Heaysman, J. E. M. Observations on the Social Behaviour  
1253 of Cells in Tissue Culture .2. Monolayering of Fibroblasts. *Exp Cell Res* **6**, 293-306  
1254 (1954).

1255 10 Lin, B., Yin, T., Wu, Y. I., Inoue, T. & Levchenko, A. Interplay between  
1256 chemotaxis and contact inhibition of locomotion determines exploratory cell  
1257 migration. *Nat Commun* **6**, 6619, doi:10.1038/ncomms7619 (2015).

1258 11 Roycroft, A. & Mayor, R. Michael Abercrombie: contact inhibition of locomotion  
1259 and more. *Int J Dev Biol* **62**, 5-13, doi:10.1387/ijdb.170277rm (2018).

1260 12 Stramer, B. & Mayor, R. Mechanisms and in vivo functions of contact inhibition  
1261 of locomotion. *Nat Rev Mol Cell Bio* **18**, 43-55 (2017).

1262 13 Roycroft, A. *et al.* Redistribution of Adhesive Forces through Src/FAK Drives  
1263 Contact Inhibition of Locomotion in Neural Crest. *Dev Cell* **45**, 565-579 e563,  
1264 doi:10.1016/j.devcel.2018.05.003 (2018).

1265 14 Theveneau, E. *et al.* Chase-and-run between adjacent cell populations  
1266 promotes directional collective migration. *Nat Cell Biol* **15**, 763-+ (2013).

- 1267 15 Scarpa, E. *et al.* Cadherin Switch during EMT in Neural Crest Cells Leads to  
1268 Contact Inhibition of Locomotion via Repolarization of Forces. *Dev Cell* **34**, 421-434,  
1269 doi:10.1016/j.devcel.2015.06.012 (2015).
- 1270 16 Carmona-Fontaine, C. *et al.* Contact inhibition of locomotion in vivo controls  
1271 neural crest directional migration. *Nature* **456**, 957-961, doi:10.1038/nature07441  
1272 (2008).
- 1273 17 Bate, M. & Martinez Arias, A. *The Development of Drosophila melanogaster*.  
1274 (Cold Spring Harbor Laboratory Press, 1993).
- 1275 18 Estrada, B., Casares, F. & Sanchez-Herrero, E. Development of the genitalia  
1276 in *Drosophila melanogaster*. *Differentiation* **71**, 299-310, doi:10.1046/j.1432-  
1277 0436.2003.03017.x (2003).
- 1278 19 Kuckwa, J., Fritzen, K., Buttgereit, D., Rothenbusch-Fender, S. & Renkawitz-  
1279 Pohl, R. A new level of plasticity: *Drosophila* smooth-like testes muscles compensate  
1280 failure of myoblast fusion. *Development* **143**, 329-338, doi:10.1242/dev.126730  
1281 (2016).
- 1282 20 Nanda, S. *et al.* Sox100B, a *Drosophila* Group E Sox-domain Gene, Is  
1283 Required for Somatic Testis Differentiation. *Sex Dev* **3**, 26-37,  
1284 doi:10.1159/000200079 (2009).
- 1285 21 Kozopas, K. M., Samos, C. H. & Nusse, R. DWnt-2, a *Drosophila* Wnt gene  
1286 required for the development of the male reproductive tract, specifies a sexually  
1287 dimorphic cell fate. *Genes Dev* **12**, 1155-1165, doi:10.1101/gad.12.8.1155 (1998).
- 1288 22 Susic-Jung, L. *et al.* Multinucleated smooth muscles and mononucleated as  
1289 well as multinucleated striated muscles develop during establishment of the male  
1290 reproductive organs of *Drosophila melanogaster*. *Dev Biol* **370**, 86-97 (2012).
- 1291 23 Liepe, J. *et al.* Accurate Reconstruction of Cell and Particle Tracks from 3D  
1292 Live Imaging Data. *Cell Syst* **3**, 102-107, doi:10.1016/j.cels.2016.06.002 (2016).
- 1293 24 Nolen, B. J. *et al.* Characterization of two classes of small molecule inhibitors  
1294 of Arp2/3 complex. *Nature* **460**, 1031-U1121, doi:10.1038/nature08231 (2009).
- 1295 25 Rizvi, S. A. *et al.* Identification and characterization of a small molecule  
1296 inhibitor of formin-mediated actin assembly. *Chem Biol* **16**, 1158-1168,  
1297 doi:10.1016/j.chembiol.2009.10.006 (2009).
- 1298 26 Sturner, T. *et al.* Transient localization of the Arp2/3 complex initiates neuronal  
1299 dendrite branching in vivo. *Development* **146**, doi:10.1242/dev.171397 (2019).
- 1300 27 Jacquemet, G., Hamidi, H. & Ivaska, J. Filopodia in cell adhesion, 3D  
1301 migration and cancer cell invasion. *Curr Opin Cell Biol* **36**, 23-31,  
1302 doi:10.1016/j.ceb.2015.06.007 (2015).
- 1303 28 Nagel, B. M., Bechtold, M., Rodriguez, L. G. & Bogdan, S. *Drosophila* WASH  
1304 is required for integrin-mediated cell adhesion, cell motility and lysosomal  
1305 neutralization. *J Cell Sci* **130**, 344-359, doi:10.1242/jcs.193086 (2017).

- 1306 29 Theveneau, E. & Linker, C. Leaders in collective migration: are front cells  
1307 really endowed with a particular set of skills? *F1000Res* **6**, 1899,  
1308 doi:10.12688/f1000research.11889.1 (2017).
- 1309 30 Rothenbusch-Fender, S. *et al.* Myotube migration to cover and shape the  
1310 testis of *Drosophila* depends on Heartless, Cadherin/Catenin, and myosin II. *Biol*  
1311 *Open* **6**, 1876-1888, doi:10.1242/bio.025940 (2017).
- 1312 31 Iwai, Y. *et al.* Axon patterning requires DN-cadherin, a novel neuronal  
1313 adhesion receptor, in the *Drosophila* embryonic CNS. *Neuron* **19**, 77-89 (1997).
- 1314 32 Hunter, M. V. & Fernandez-Gonzalez, R. Coordinating cell movements in vivo:  
1315 junctional and cytoskeletal dynamics lead the way. *Curr Opin Cell Biol* **48**, 54-62,  
1316 doi:10.1016/j.ceb.2017.05.005 (2017).
- 1317 33 Rottner, K., Faix, J., Bogdan, S., Linder, S. & Kerkhoff, E. Actin assembly  
1318 mechanisms at a glance. *J Cell Sci* **130**, 3427-3435, doi:10.1242/jcs.206433 (2017).
- 1319 34 Rottner, K. & Schaks, M. Assembling actin filaments for protrusion. *Curr Opin*  
1320 *Cell Biol* **56**, 53-63, doi:10.1016/j.ceb.2018.09.004 (2019).
- 1321 35 Hakeda-Suzuki, S. *et al.* Rac function and regulation during *Drosophila*  
1322 development. *Nature* **416**, 438-442, doi:10.1038/416438a (2002).
- 1323 36 Chen, Z. C. *et al.* Structure and control of the actin regulatory WAVE complex.  
1324 *Nature* **468**, 533-U207, doi:10.1038/nature09623 (2010).
- 1325 37 Hariharan, I. K. *et al.* Characterization of Rho Gtpase Family Homologs in  
1326 *Drosophila-Melanogaster* - Overexpressing Rho1 in Retinal Cells Causes a Late  
1327 Developmental Defect. *Embo J* **14**, 292-302, doi:DOI 10.1002/j.1460-  
1328 2075.1995.tb07003.x (1995).
- 1329 38 Sasamura, T. *et al.* Molecular cloning and characterization of *Drosophila*  
1330 genes encoding small GTPases of the rab and rho families. *Mol Gen Genet* **254**,  
1331 486-494, doi:10.1007/s004380050443 (1997).
- 1332 39 Munjal, A., Philippe, J. M., Munro, E. & Lecuit, T. A self-organized  
1333 biomechanical network drives shape changes during tissue morphogenesis. *Nature*  
1334 **524**, 351-355, doi:10.1038/nature14603 (2015).
- 1335 40 Settleman, J. Rac 'n Rho: the music that shapes a developing embryo. *Dev*  
1336 *Cell* **1**, 321-331, doi:10.1016/s1534-5807(01)00053-3 (2001).
- 1337 41 Hodge, R. G. & Ridley, A. J. Regulating Rho GTPases and their regulators.  
1338 *Nat Rev Mol Cell Biol* **17**, 496-510, doi:10.1038/nrm.2016.67 (2016).
- 1339 42 Ishizaki, T. *et al.* Pharmacological properties of Y-27632, a specific inhibitor of  
1340 rho-associated kinases. *Mol Pharmacol* **57**, 976-983 (2000).
- 1341 43 Straight, A. F. *et al.* Dissecting temporal and spatial control of cytokinesis with  
1342 a myosin II inhibitor. *Science* **299**, 1743-1747, doi:10.1126/science.1081412 (2003).

- 1343 44 Kepiro, M. *et al.* para-Nitroblebbistatin, the non-cytotoxic and photostable  
1344 myosin II inhibitor. *Angew Chem Int Ed Engl* **53**, 8211-8215,  
1345 doi:10.1002/anie.201403540 (2014).
- 1346 45 Thomas, L. A. & Yamada, K. M. Contact stimulation of cell migration. *J Cell*  
1347 *Sci* **103 ( Pt 4)**, 1211-1214 (1992).
- 1348 46 Theveneau, E. & Mayor, R. Collective cell migration of epithelial and  
1349 mesenchymal cells. *Cell Mol Life Sci* **70**, 3481-3492 (2013).
- 1350 47 Ladoux, B. & Mege, R. M. Mechanobiology of collective cell behaviours. *Nat*  
1351 *Rev Mol Cell Biol* **18**, 743-757, doi:10.1038/nrm.2017.98 (2017).
- 1352 48 Desai, R. A., Gao, L., Raghavan, S., Liu, W. F. & Chen, C. S. Cell polarity  
1353 triggered by cell-cell adhesion via E-cadherin. *J Cell Sci* **122**, 905-911,  
1354 doi:10.1242/jcs.028183 (2009).
- 1355 49 Bajanca, F. *et al.* In vivo topology converts competition for cell-matrix adhesion  
1356 into directional migration. *Nat Commun* **10**, 1518, doi:10.1038/s41467-019-09548-5  
1357 (2019).
- 1358 50 Guo, F., Debidda, M., Yang, L., Williams, D. A. & Zheng, Y. Genetic deletion of  
1359 Rac1 GTPase reveals its critical role in actin stress fiber formation and focal  
1360 adhesion complex assembly. *J Biol Chem* **281**, 18652-18659,  
1361 doi:10.1074/jbc.M603508200 (2006).
- 1362 51 Woods, M. L. *et al.* Directional Collective Cell Migration Emerges as a  
1363 Property of Cell Interactions. *Plos One* **9**, doi:ARTN e104969  
1364 10.1371/journal.pone.0104969 (2014).
- 1365 52 Szabo, A. *et al.* In vivo confinement promotes collective migration of neural  
1366 crest cells. *J Cell Biol* **213**, 543-555, doi:10.1083/jcb.201602083 (2016).
- 1367 53 Begnaud, S., Chen, T., Delacour, D., Mege, R. M. & Ladoux, B. Mechanics of  
1368 epithelial tissues during gap closure. *Curr Opin Cell Biol* **42**, 52-62,  
1369 doi:10.1016/j.ceb.2016.04.006 (2016).
- 1370 54 Krause, M. & Gautreau, A. Steering cell migration: lamellipodium dynamics  
1371 and the regulation of directional persistence. *Nat Rev Mol Cell Biol* **15**, 577-590,  
1372 doi:10.1038/nrm3861 (2014).
- 1373 55 Wu, C. Y. *et al.* Arp2/3 Is Critical for Lamellipodia and Response to  
1374 Extracellular Matrix Cues but Is Dispensable for Chemotaxis. *Cell* **148**, 973-987,  
1375 doi:10.1016/j.cell.2011.12.034 (2012).
- 1376 56 Suraneni, P. *et al.* The Arp2/3 complex is required for lamellipodia extension  
1377 and directional fibroblast cell migration. *J Cell Biol* **197**, 239-251,  
1378 doi:10.1083/jcb.201112113 (2012).
- 1379 57 Gupton, S. L. *et al.* Cell migration without a lamellipodium: translation of actin  
1380 dynamics into cell movement mediated by tropomyosin. *J Cell Biol* **168**, 619-631,  
1381 doi:10.1083/jcb.200406063 (2005).

- 1382 58 Yang, C. & Svitkina, T. Filopodia initiation: focus on the Arp2/3 complex and  
1383 formins. *Cell Adh Migr* **5**, 402-408, doi:10.4161/cam.5.5.16971 (2011).
- 1384 59 Arjonen, A., Kaukonen, R. & Ivaska, J. Filopodia and adhesion in cancer cell  
1385 motility. *Cell Adhes Migr* **5**, 421-430, doi:10.4161/cam.5.5.17723 (2011).
- 1386 60 Ashburner, M. *Drosophila*. (Cold Spring Harbor Laboratory, 1989).
- 1387 61 Ranganayakulu, G. *et al.* A series of mutations in the D-MEF2 transcription  
1388 factor reveal multiple functions in larval and adult myogenesis in *Drosophila*. *Dev Biol*  
1389 **171**, 169-181, doi:10.1006/dbio.1995.1269 (1995).
- 1390 62 Squarr, A. J. *et al.* Fat2 acts through the WAVE regulatory complex to drive  
1391 collective cell migration during tissue rotation. *J Cell Biol* **212**, 591-603,  
1392 doi:10.1083/jcb.201508081 (2016).
- 1393 63 Burgess, A. *et al.* Loss of human Greatwall results in G2 arrest and multiple  
1394 mitotic defects due to deregulation of the cyclin B-Cdc2/PP2A balance. *Proc Natl*  
1395 *Acad Sci U S A* **107**, 12564-12569, doi:10.1073/pnas.0914191107 (2010).  
1396



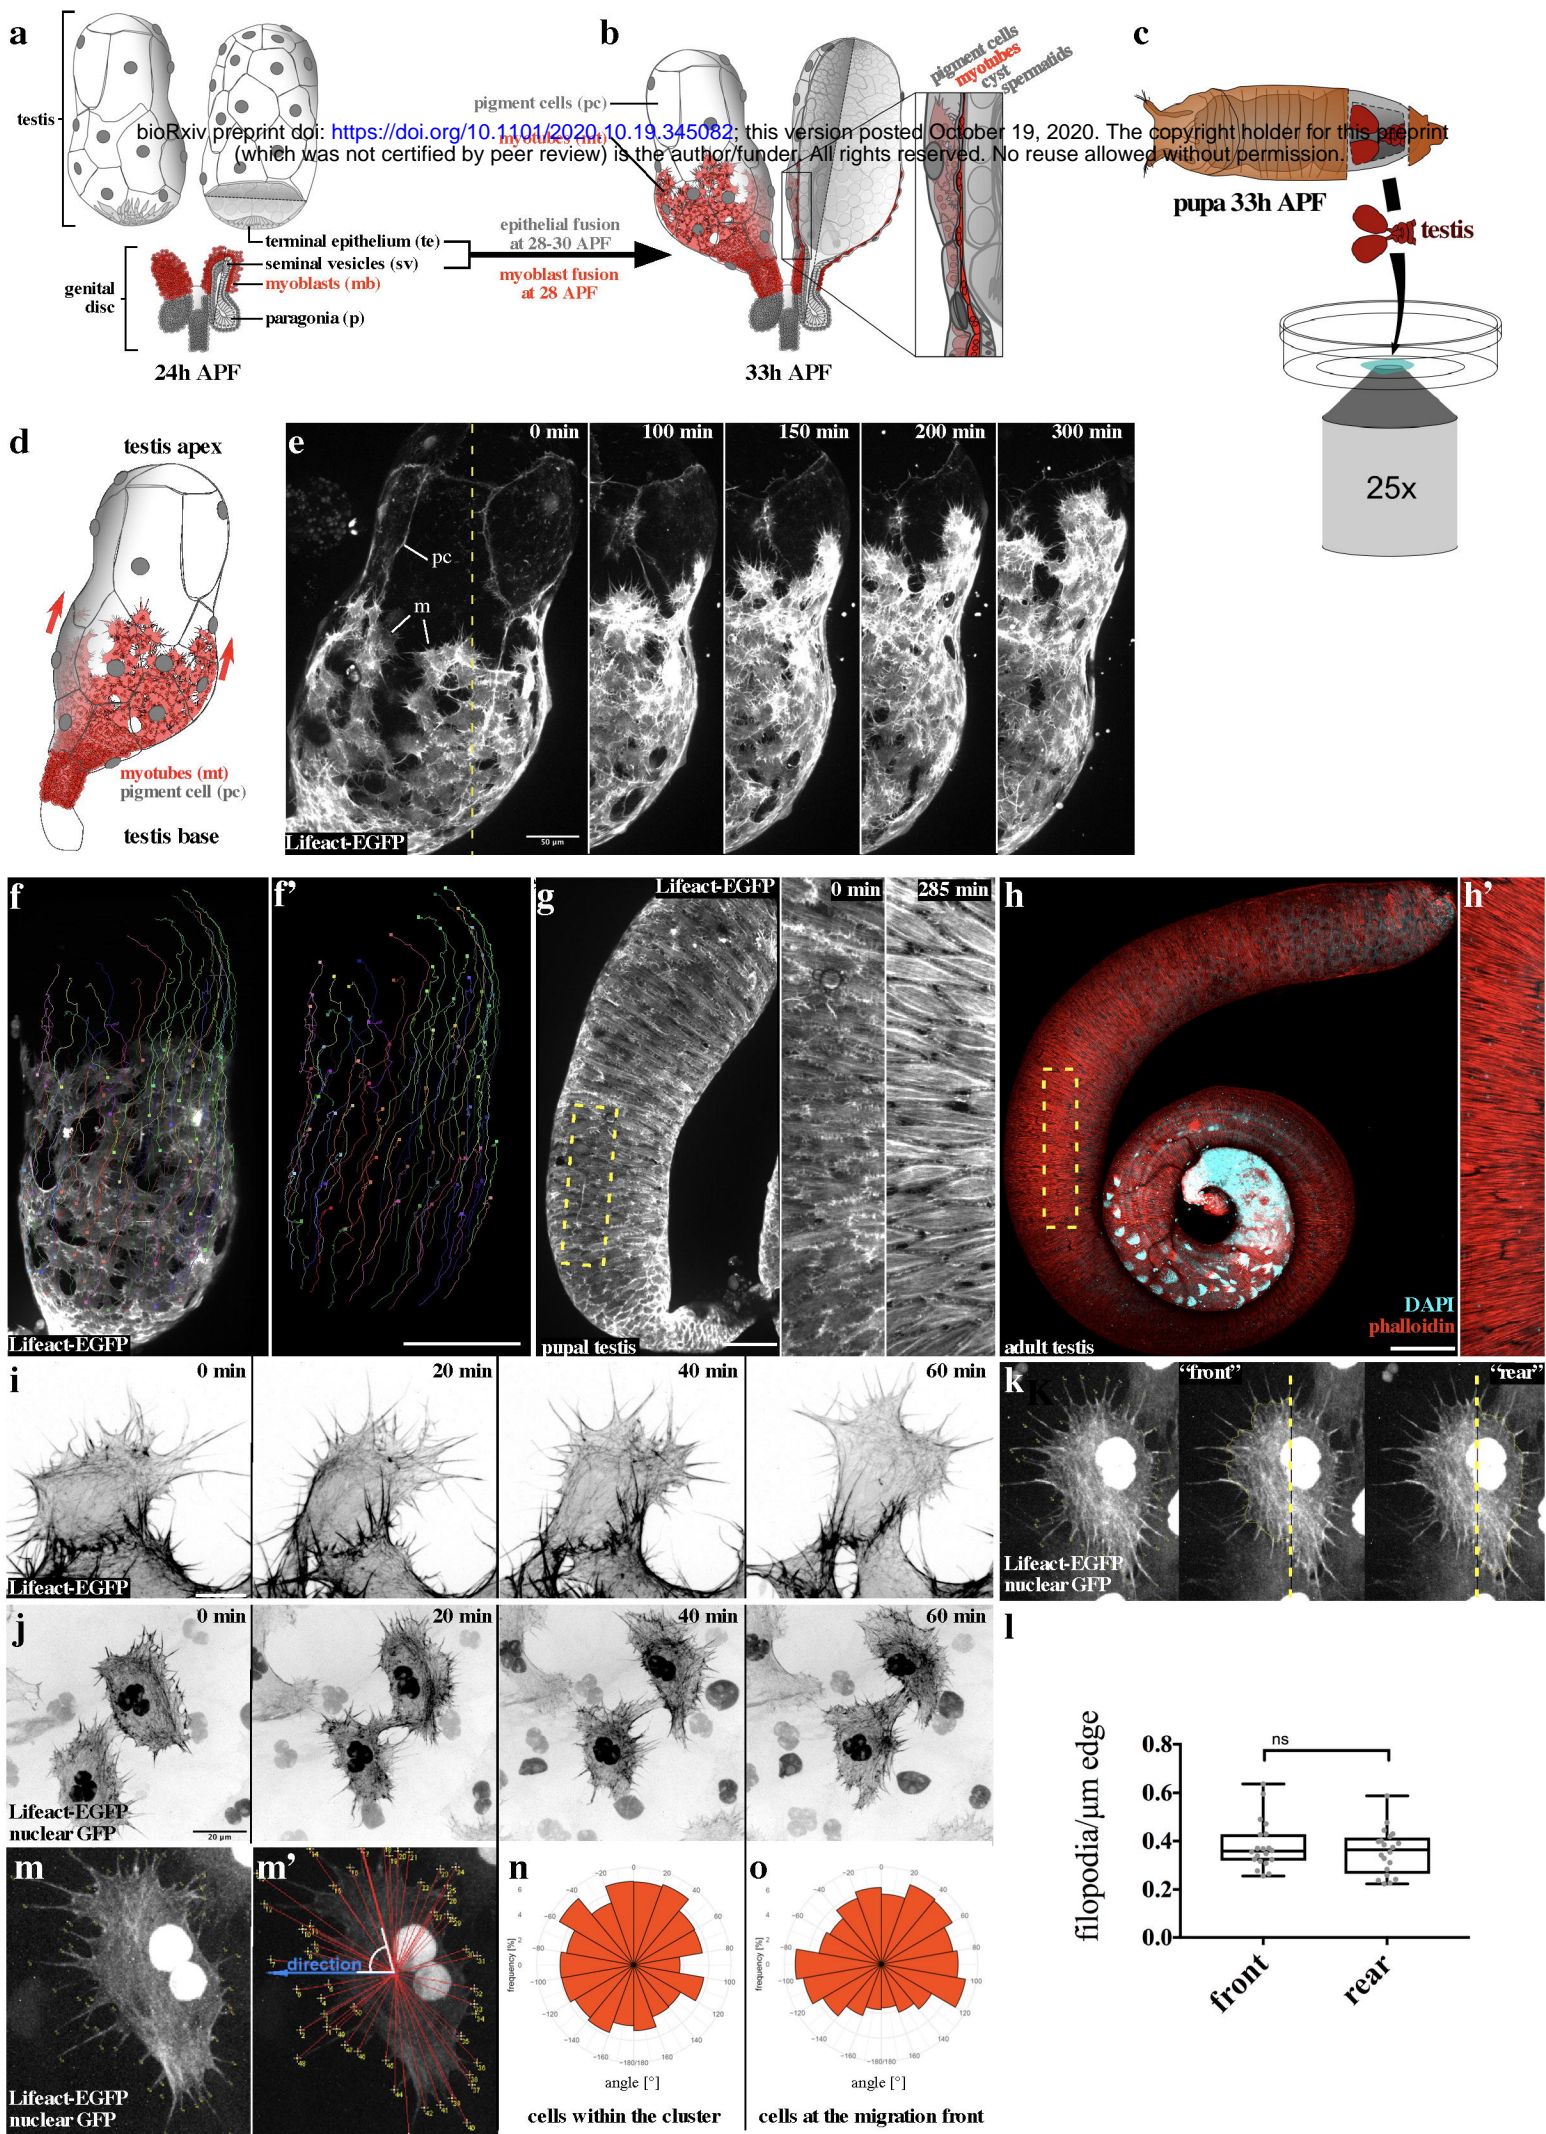

Figure 1



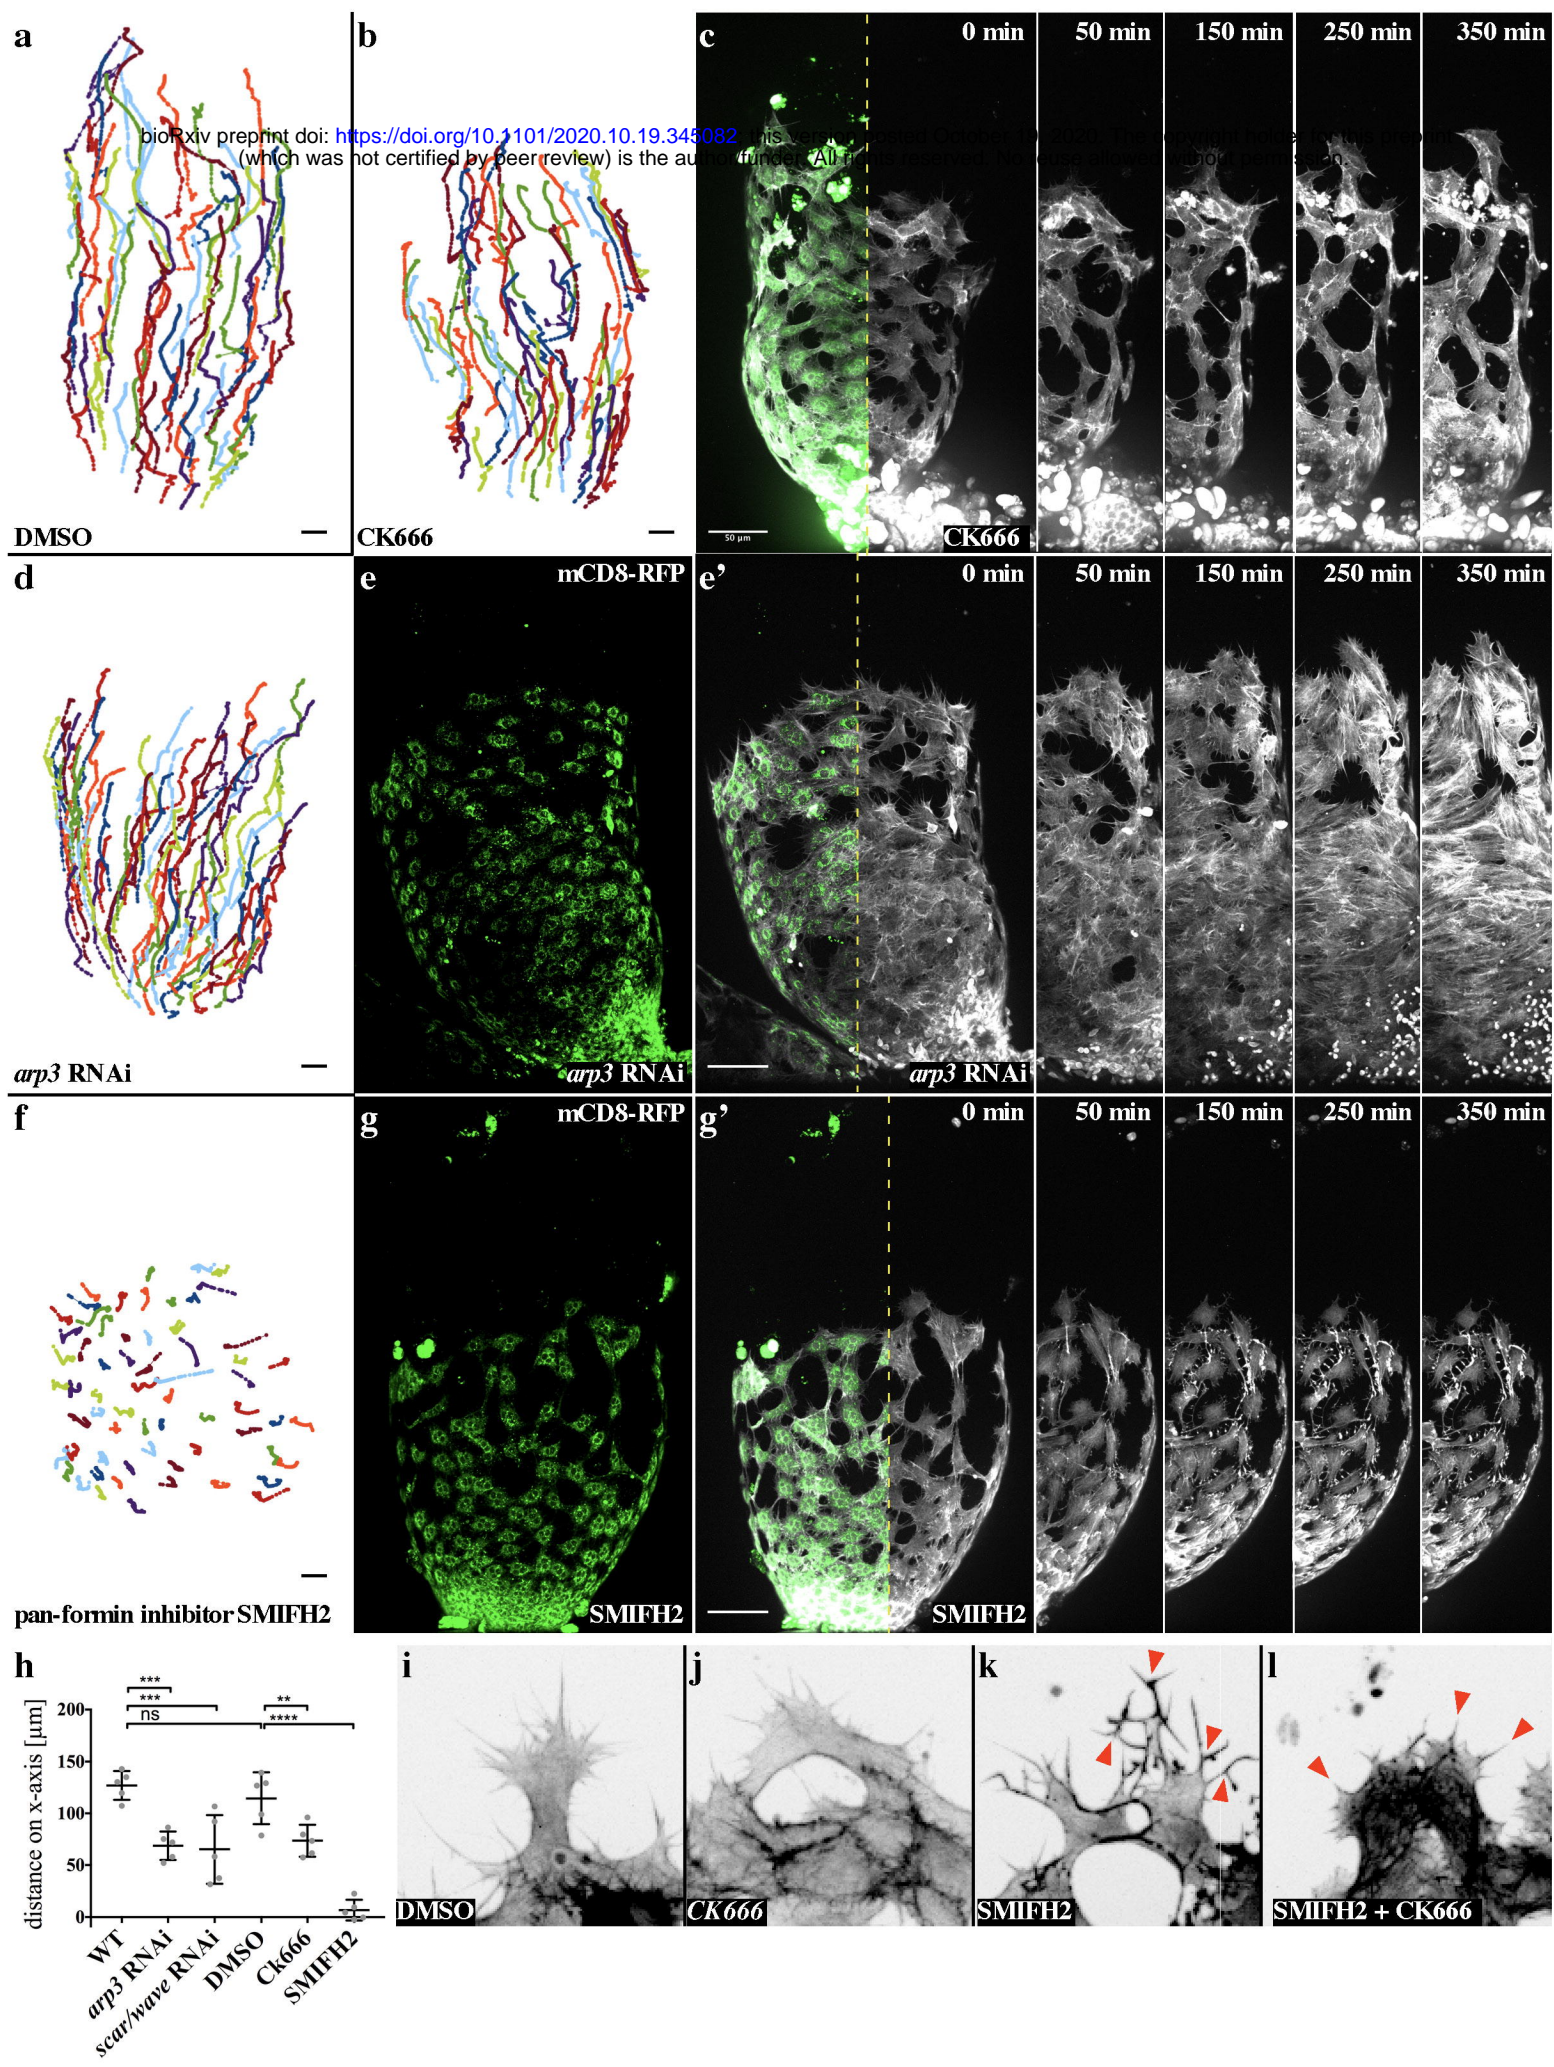

Figure 2



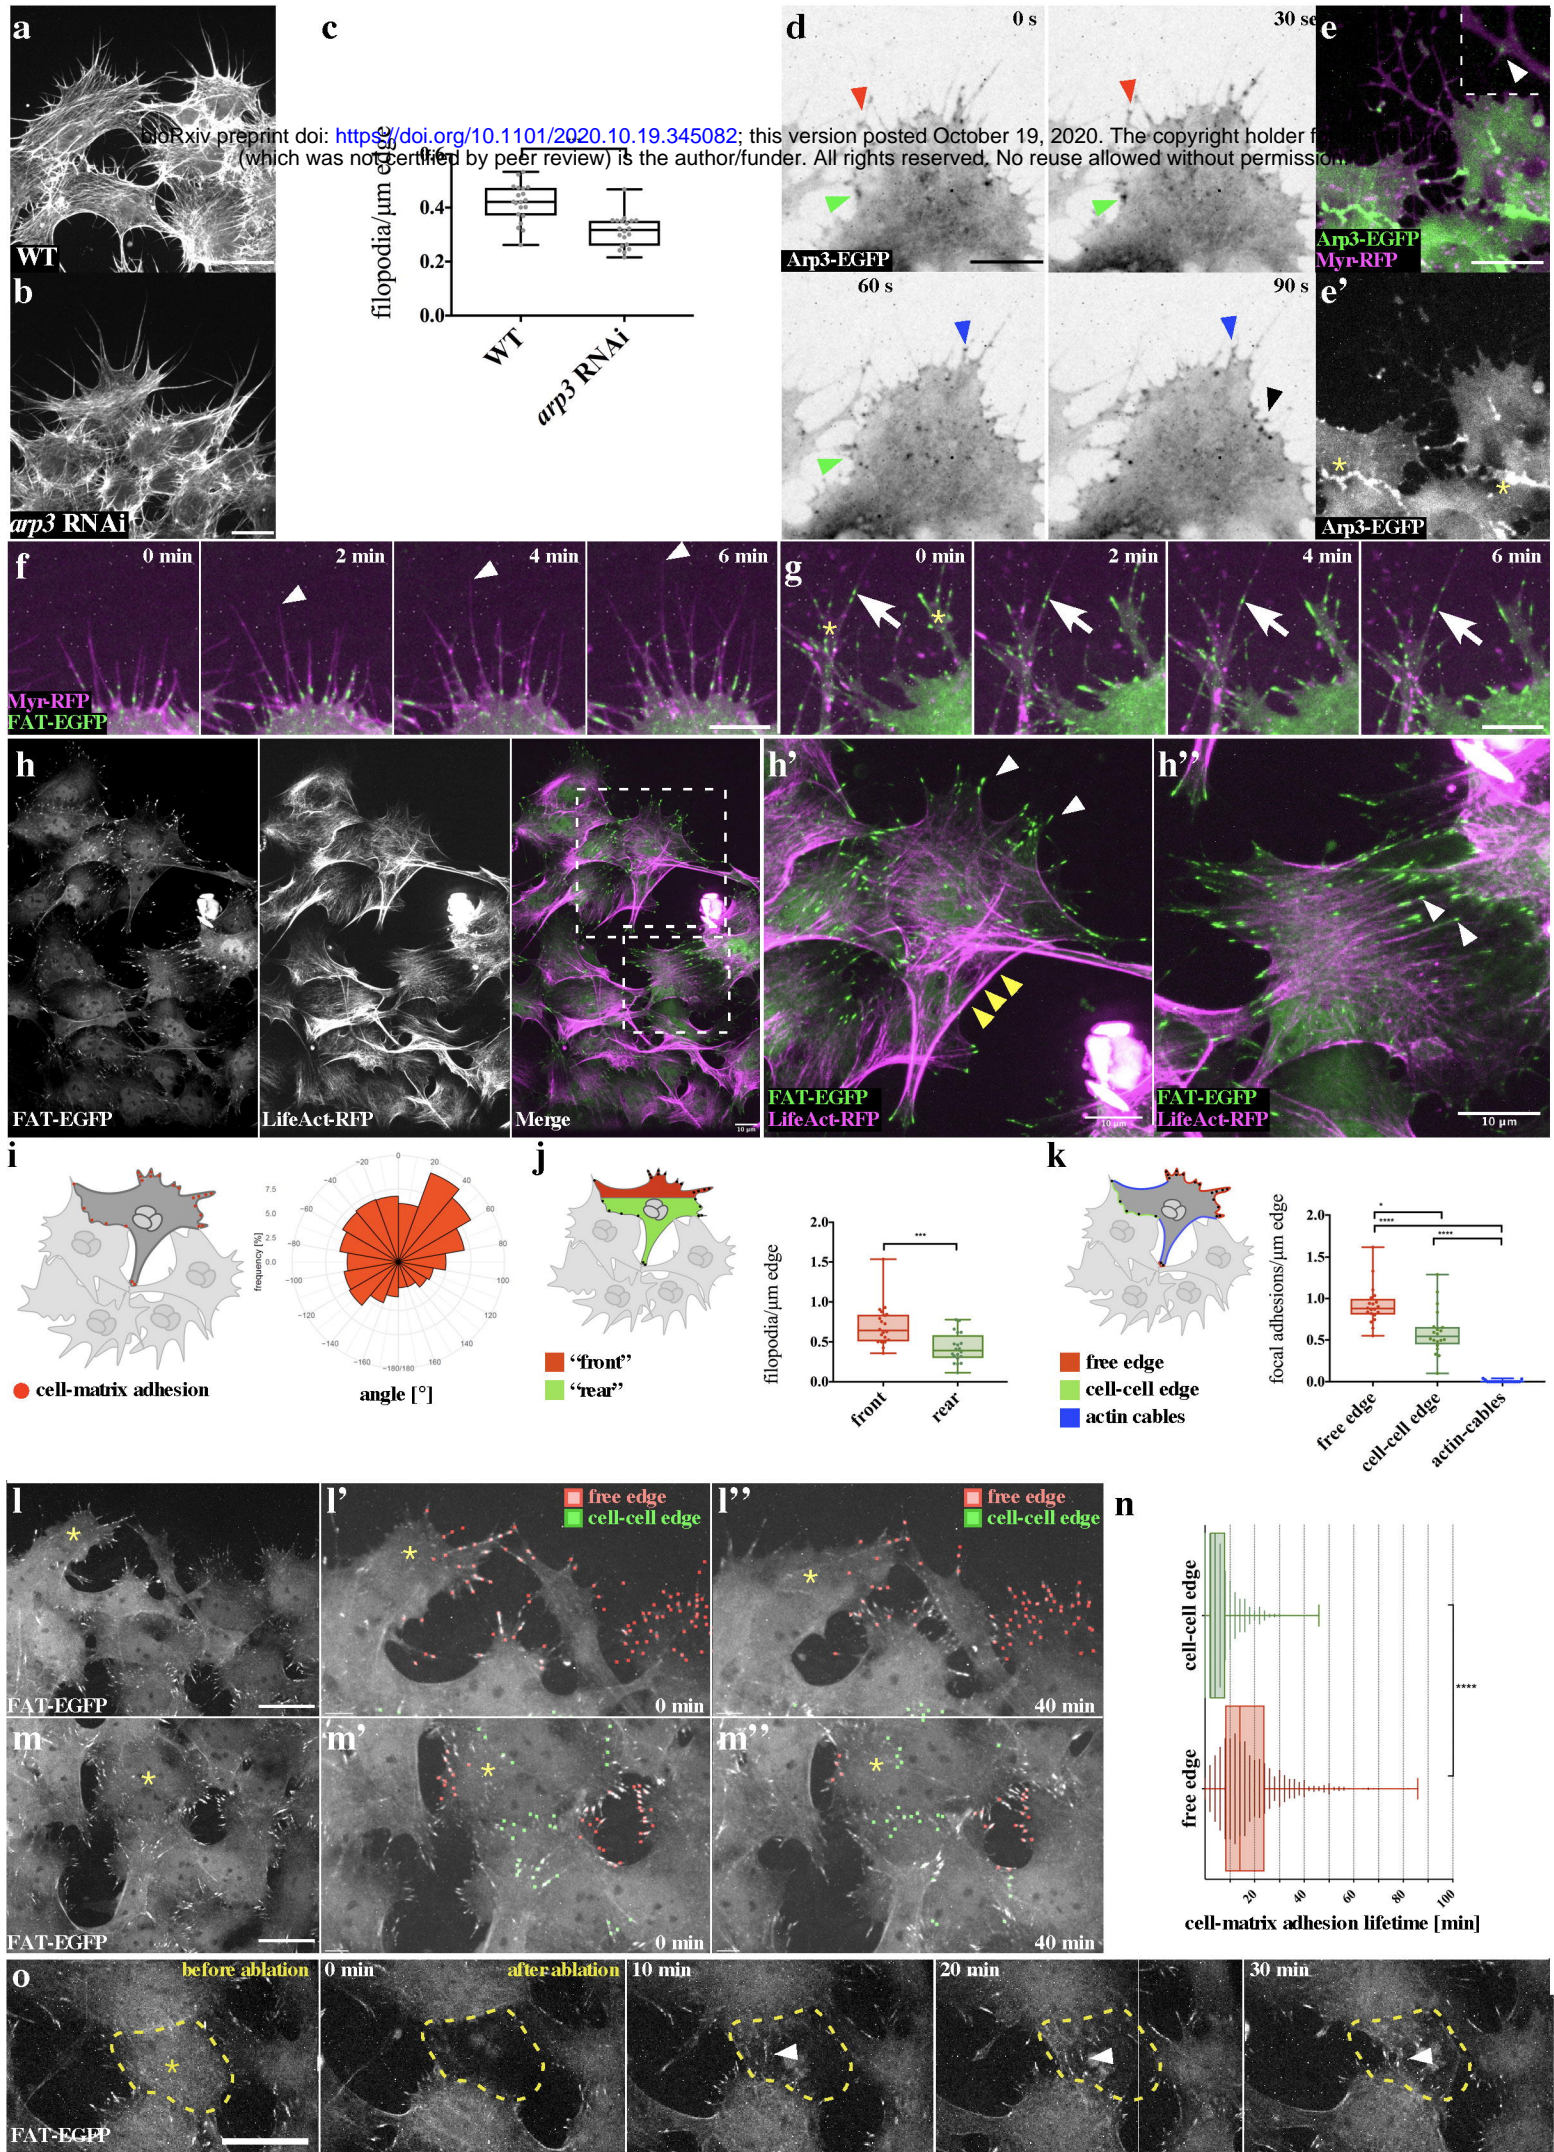

Figure 3



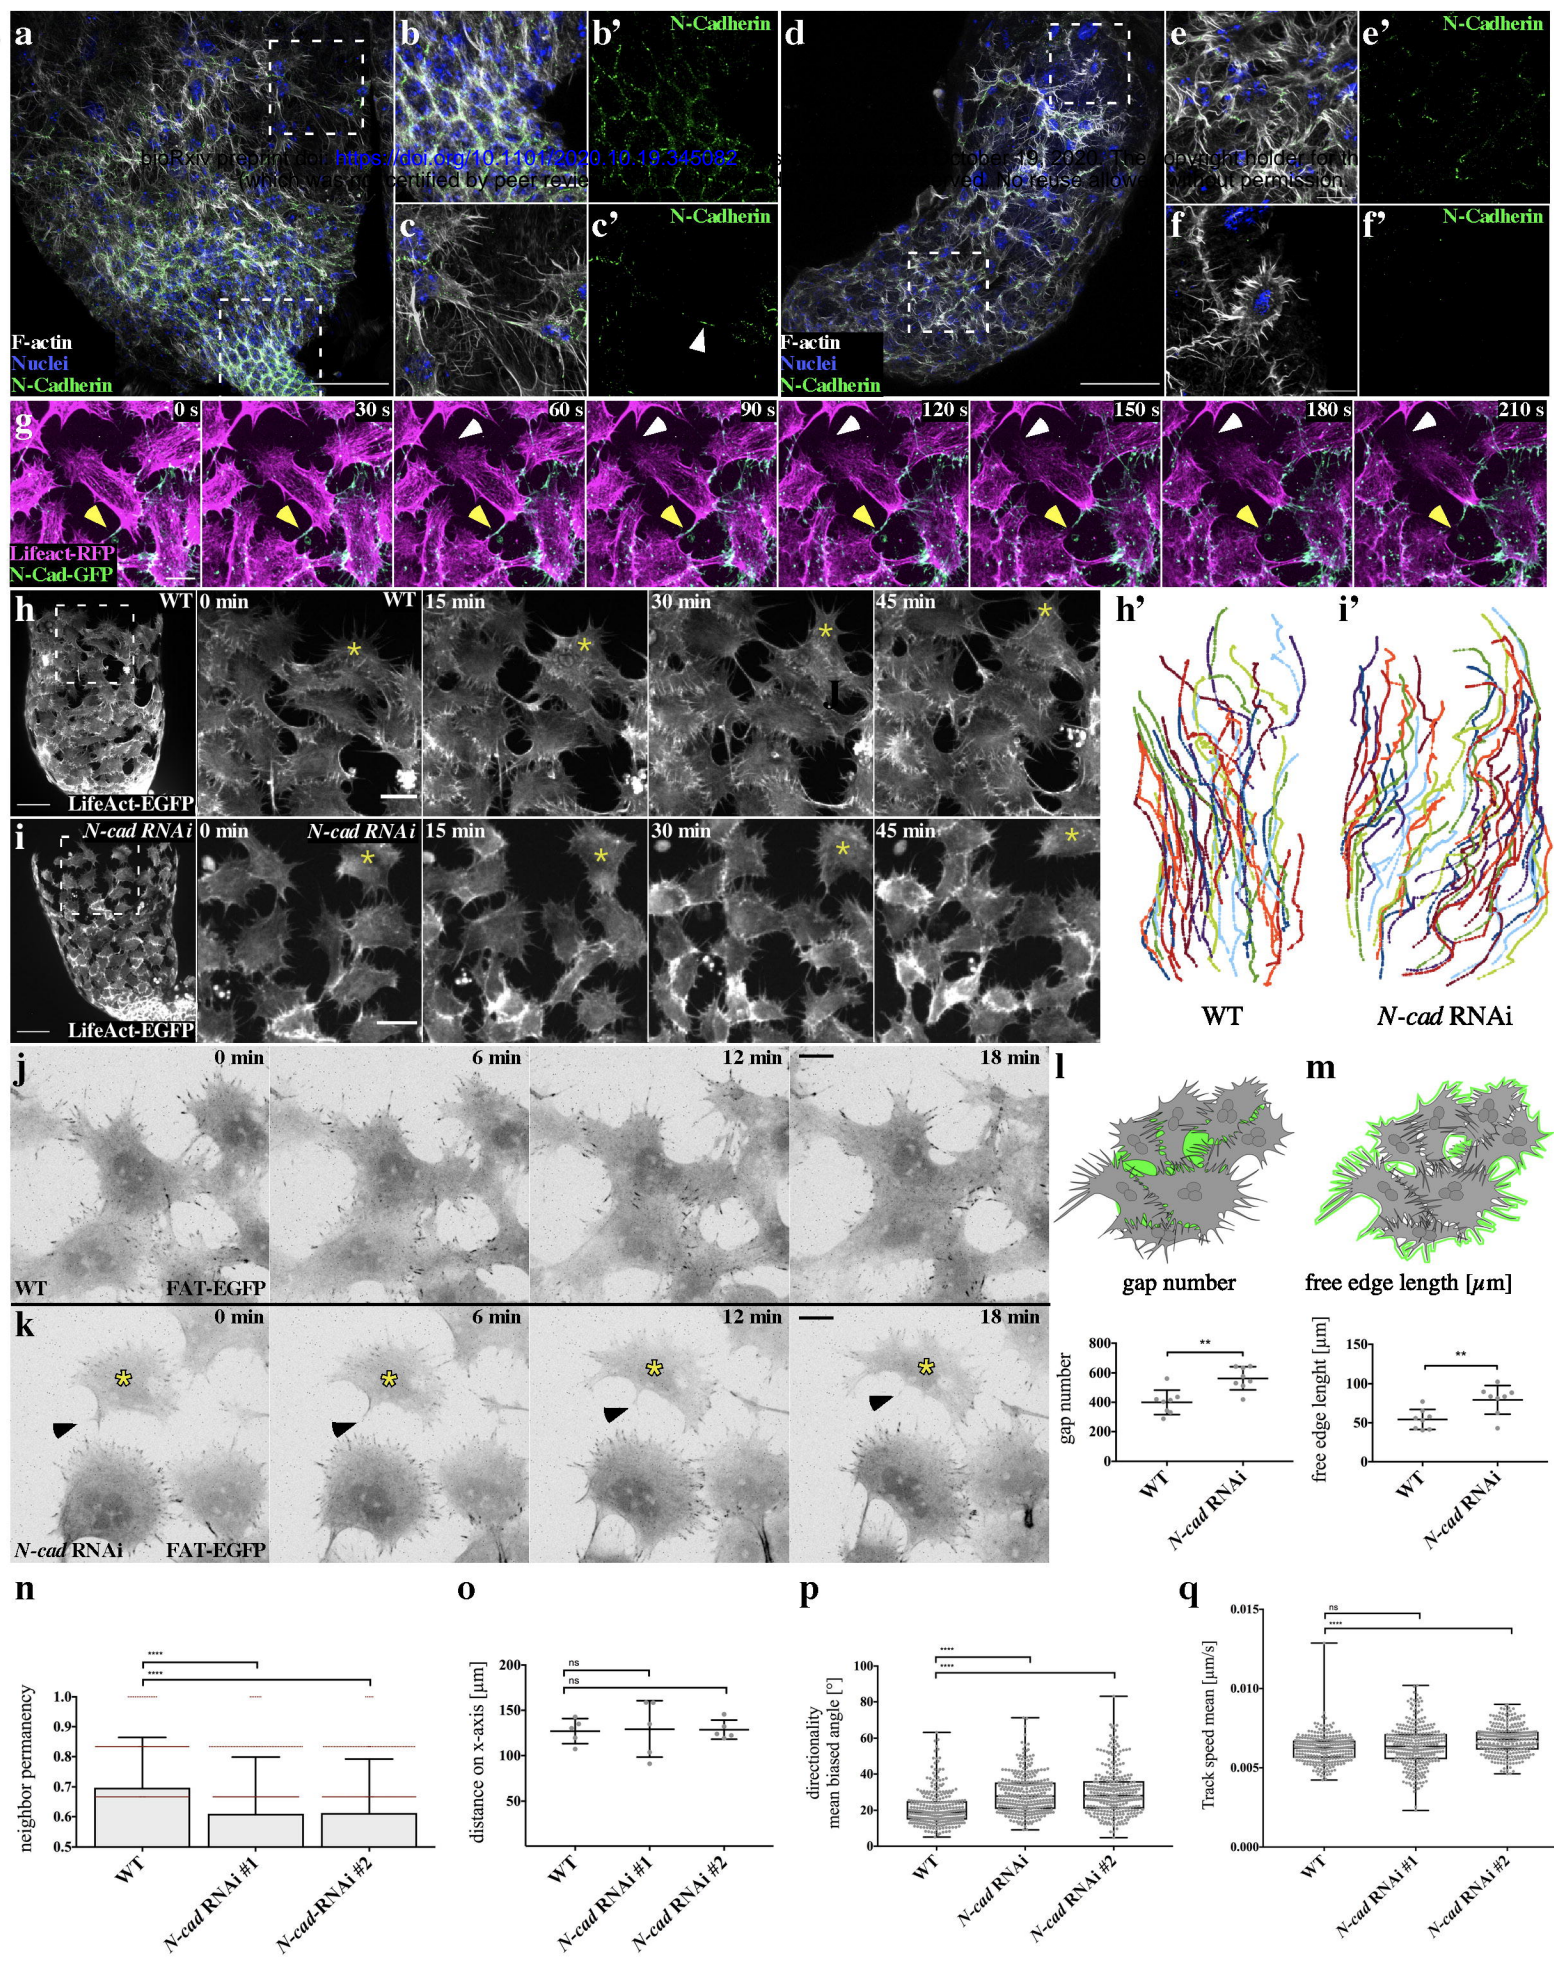

**Figure 4**



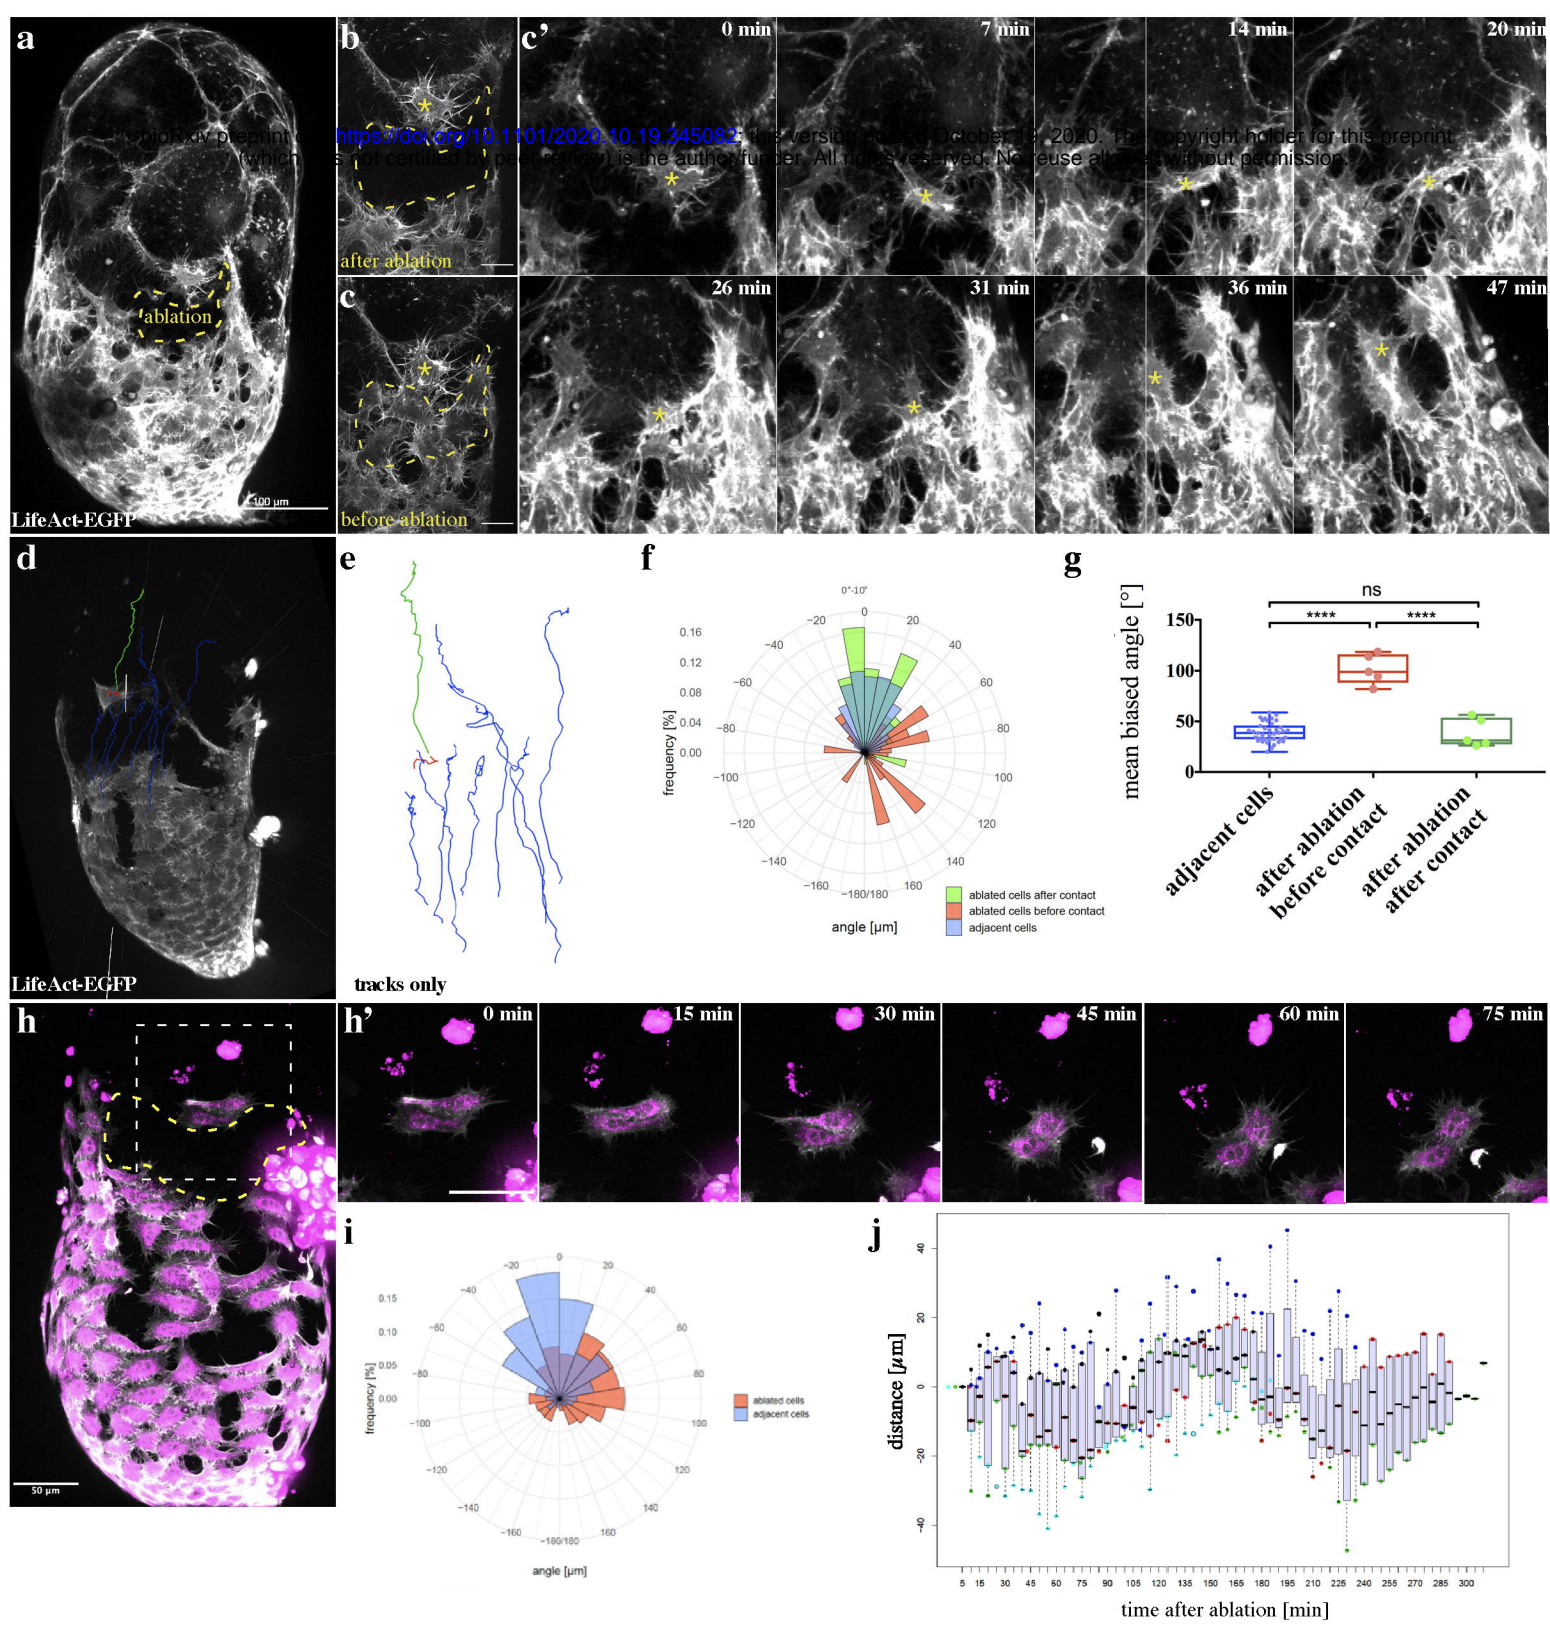

Figure 5



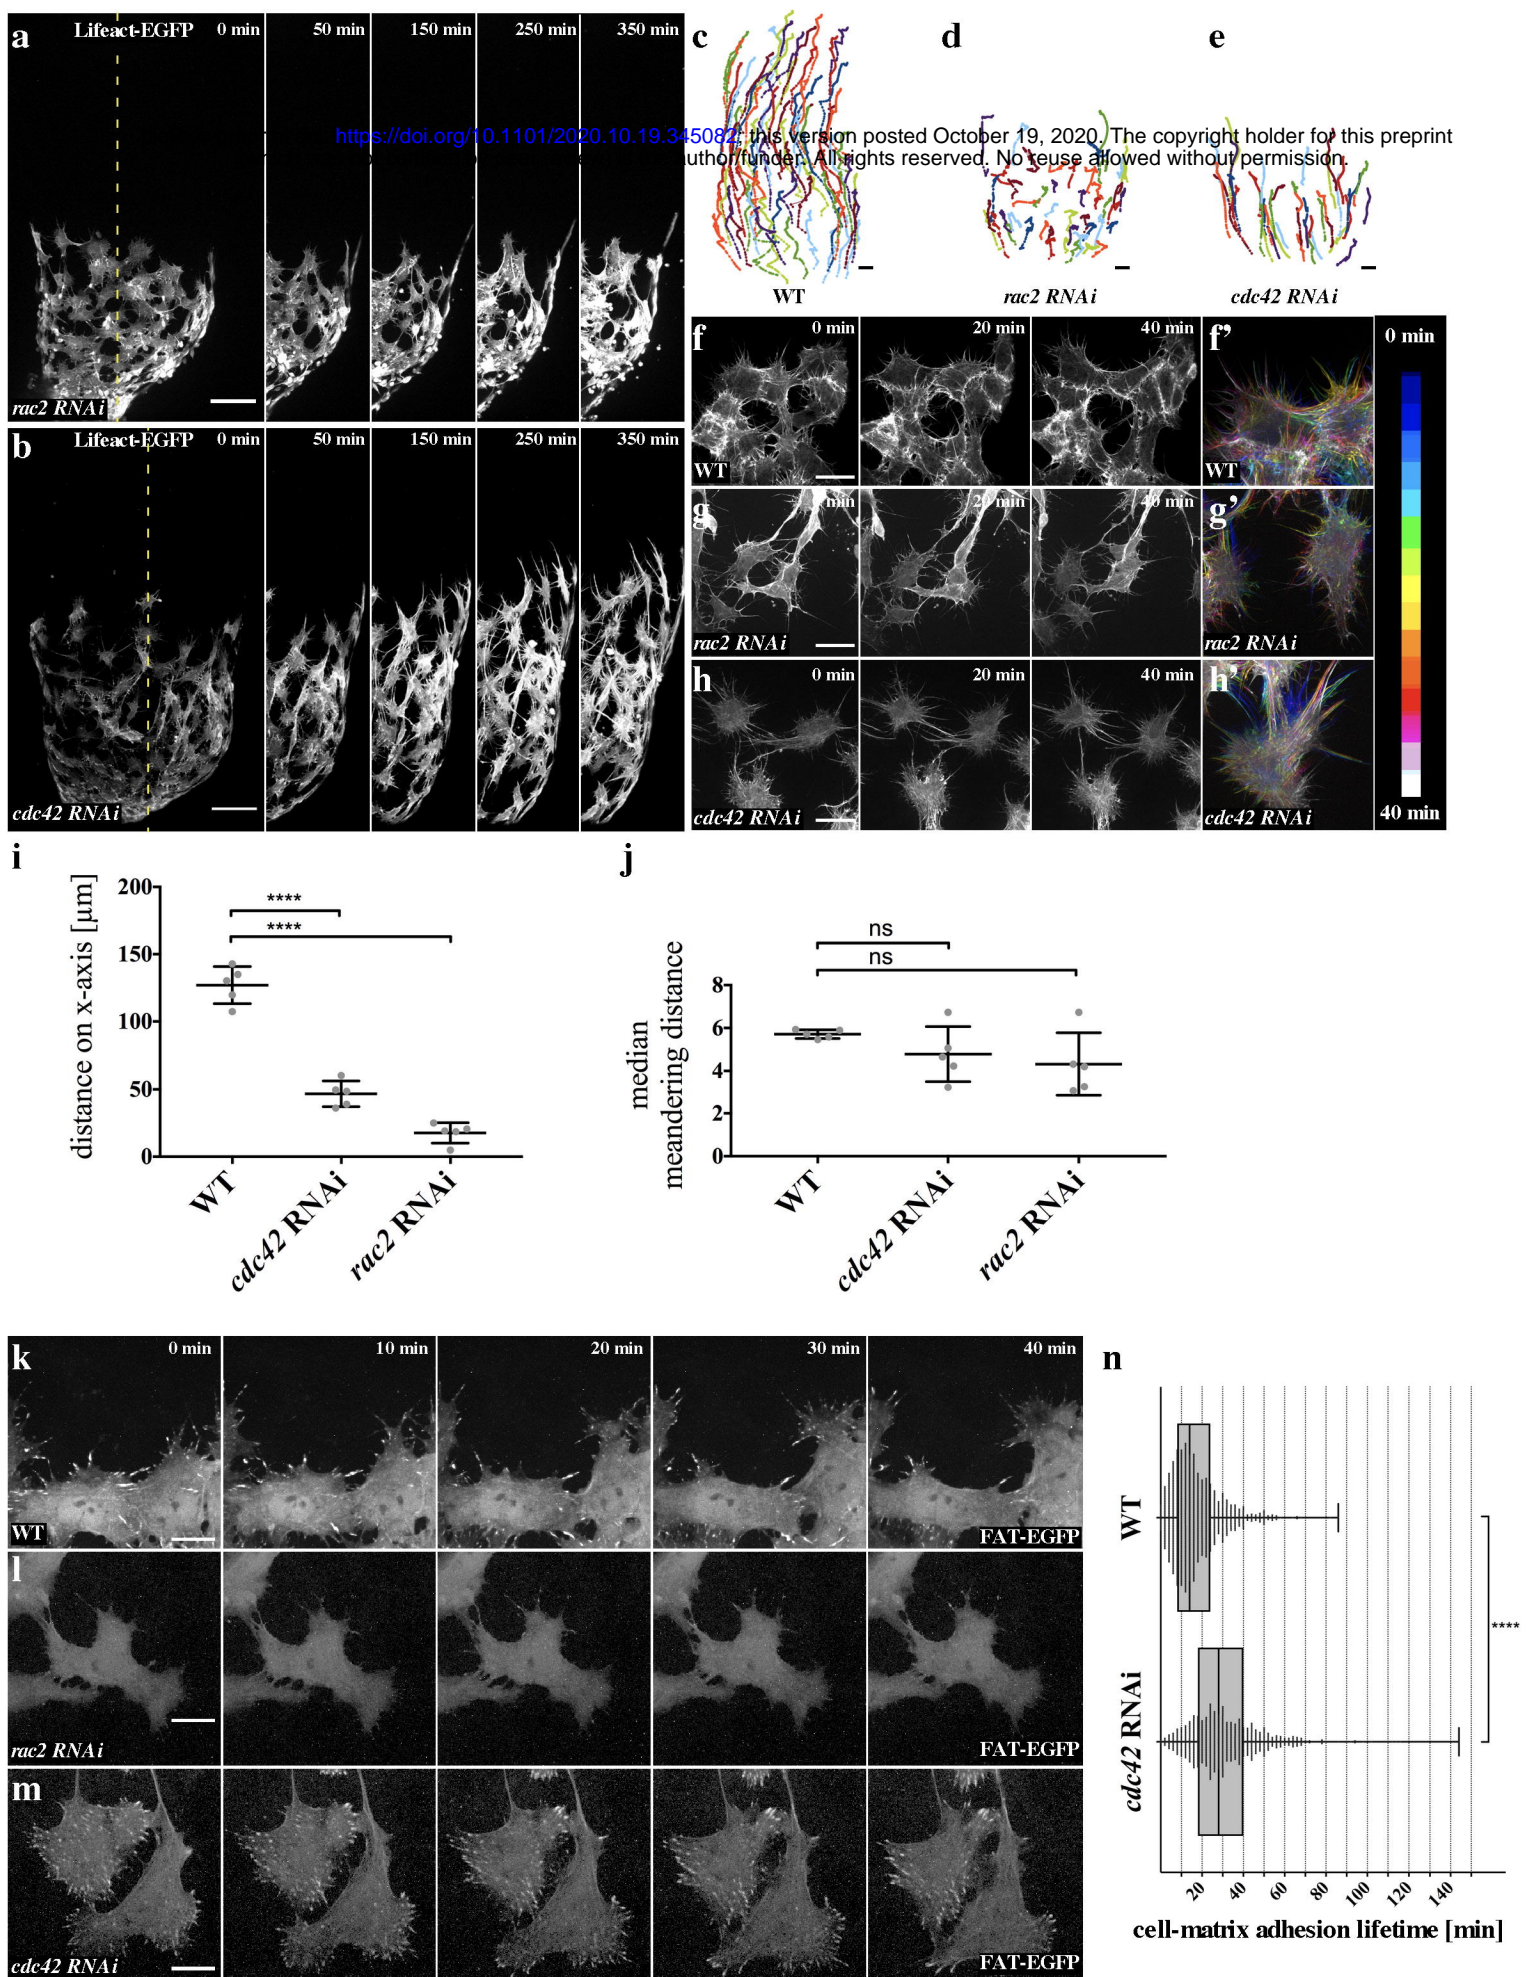

Figure 6



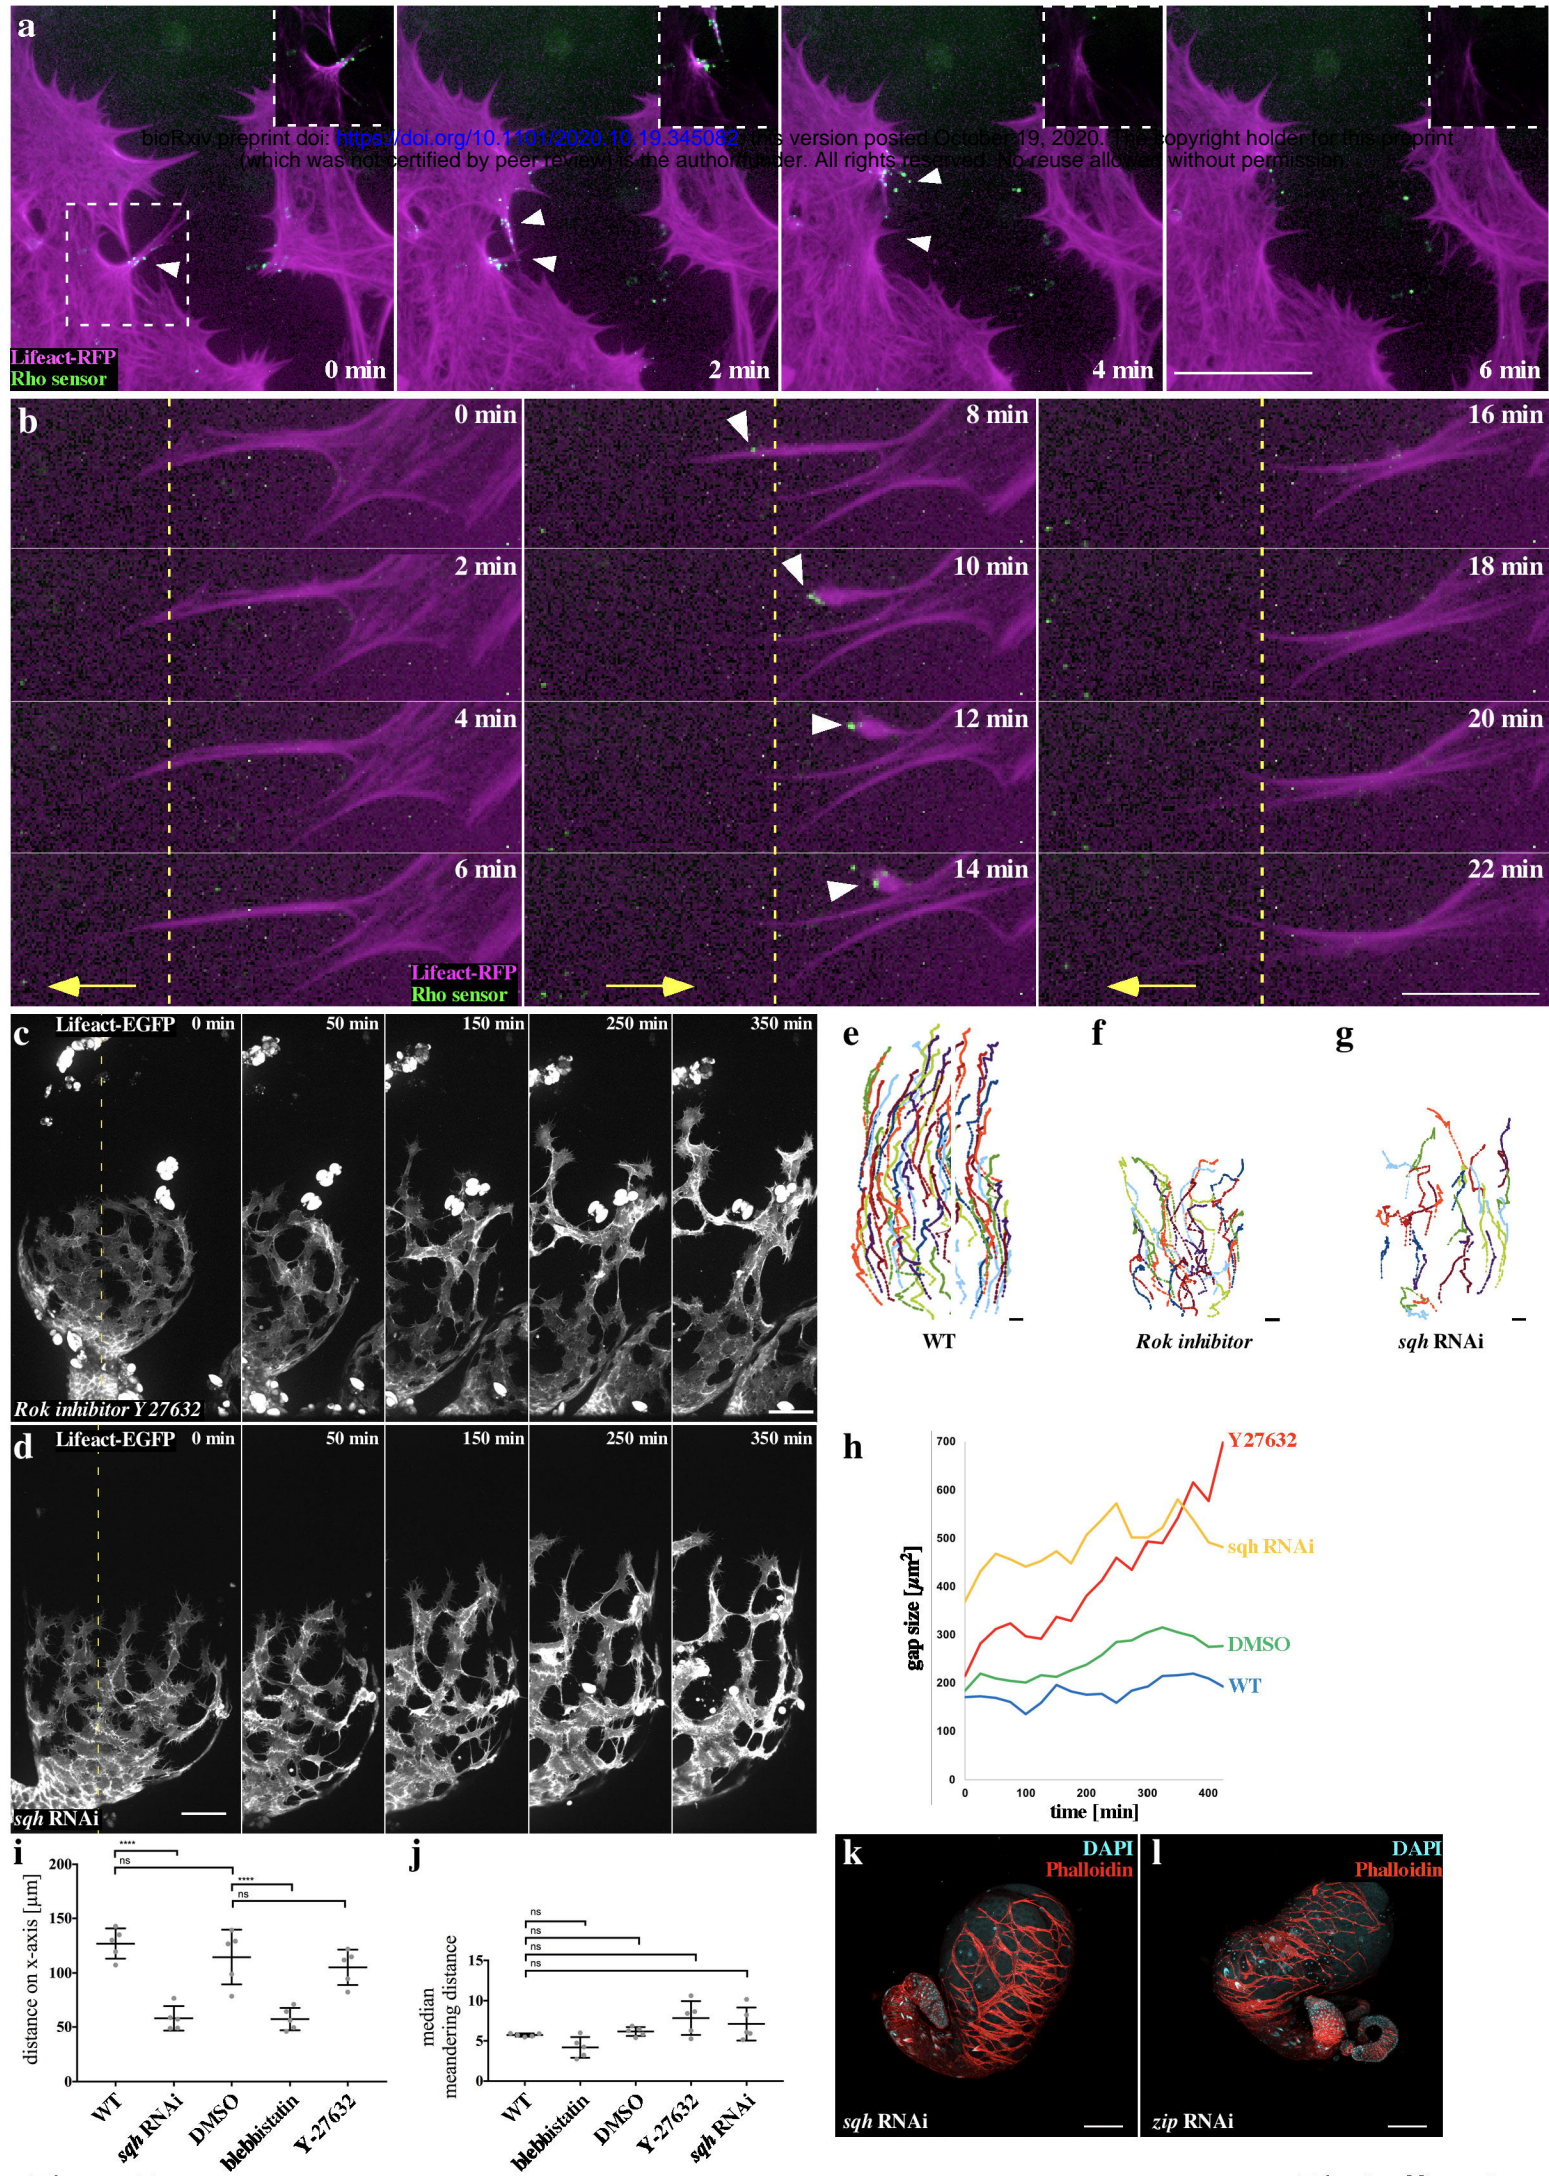

Figure 7



**a**
**filopodia based migration**      **lamellipodia based migration**

 bioRxiv preprint doi: <https://doi.org/10.1101/2020.10.19.345082>; this version posted October 19, 2020. The copyright holder for this preprint (which was not certified by peer review) is the author/funder. All rights reserved. No reuse allowed without permission.
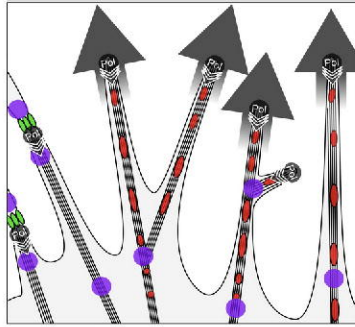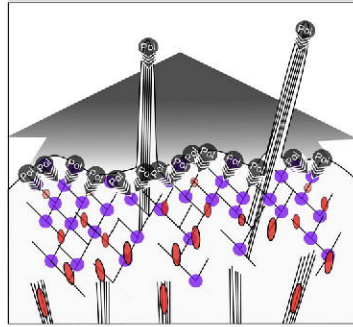

- cell-matrix adhesion
- N-cadherin
- Arp2/3
- actin polymerization
- bundled actin
- branched actin
- protrusive edge
- adhesive edge
- retractive edge
- net motion
- retraction
- actin flow

**protrusion, retraction and adhesion**
**regulation by Rho GTPases**
**behavior of an isolated cell**
**collective behavior**
**b**

testis myoblast migration

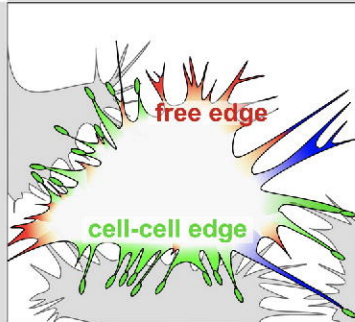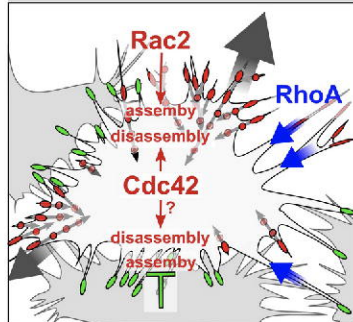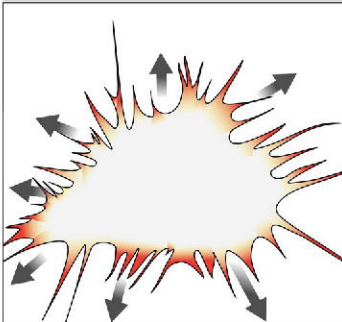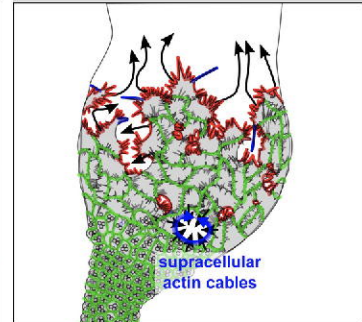**c**

contact inhibition of locomotion (CIL)

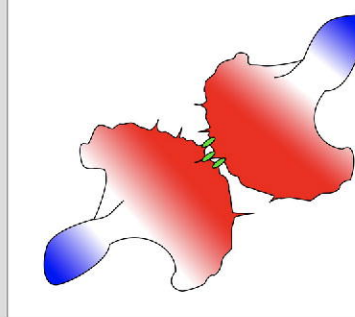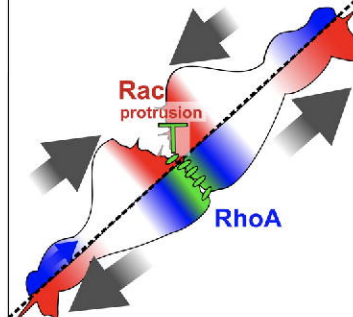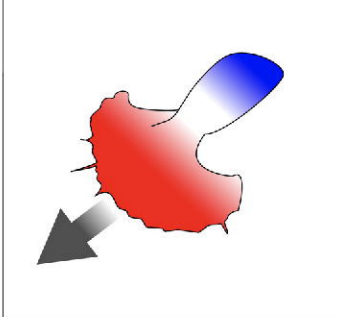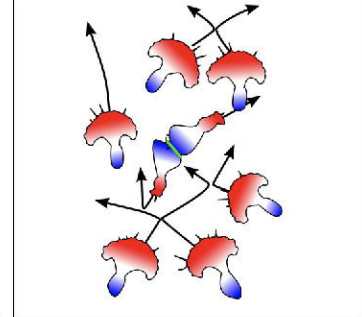



**a**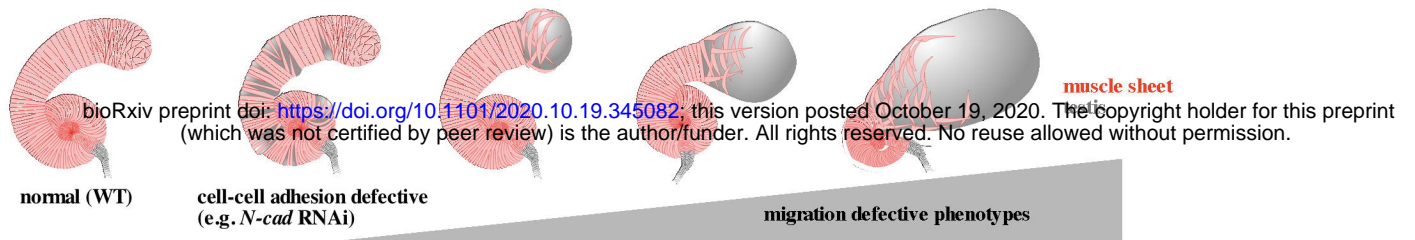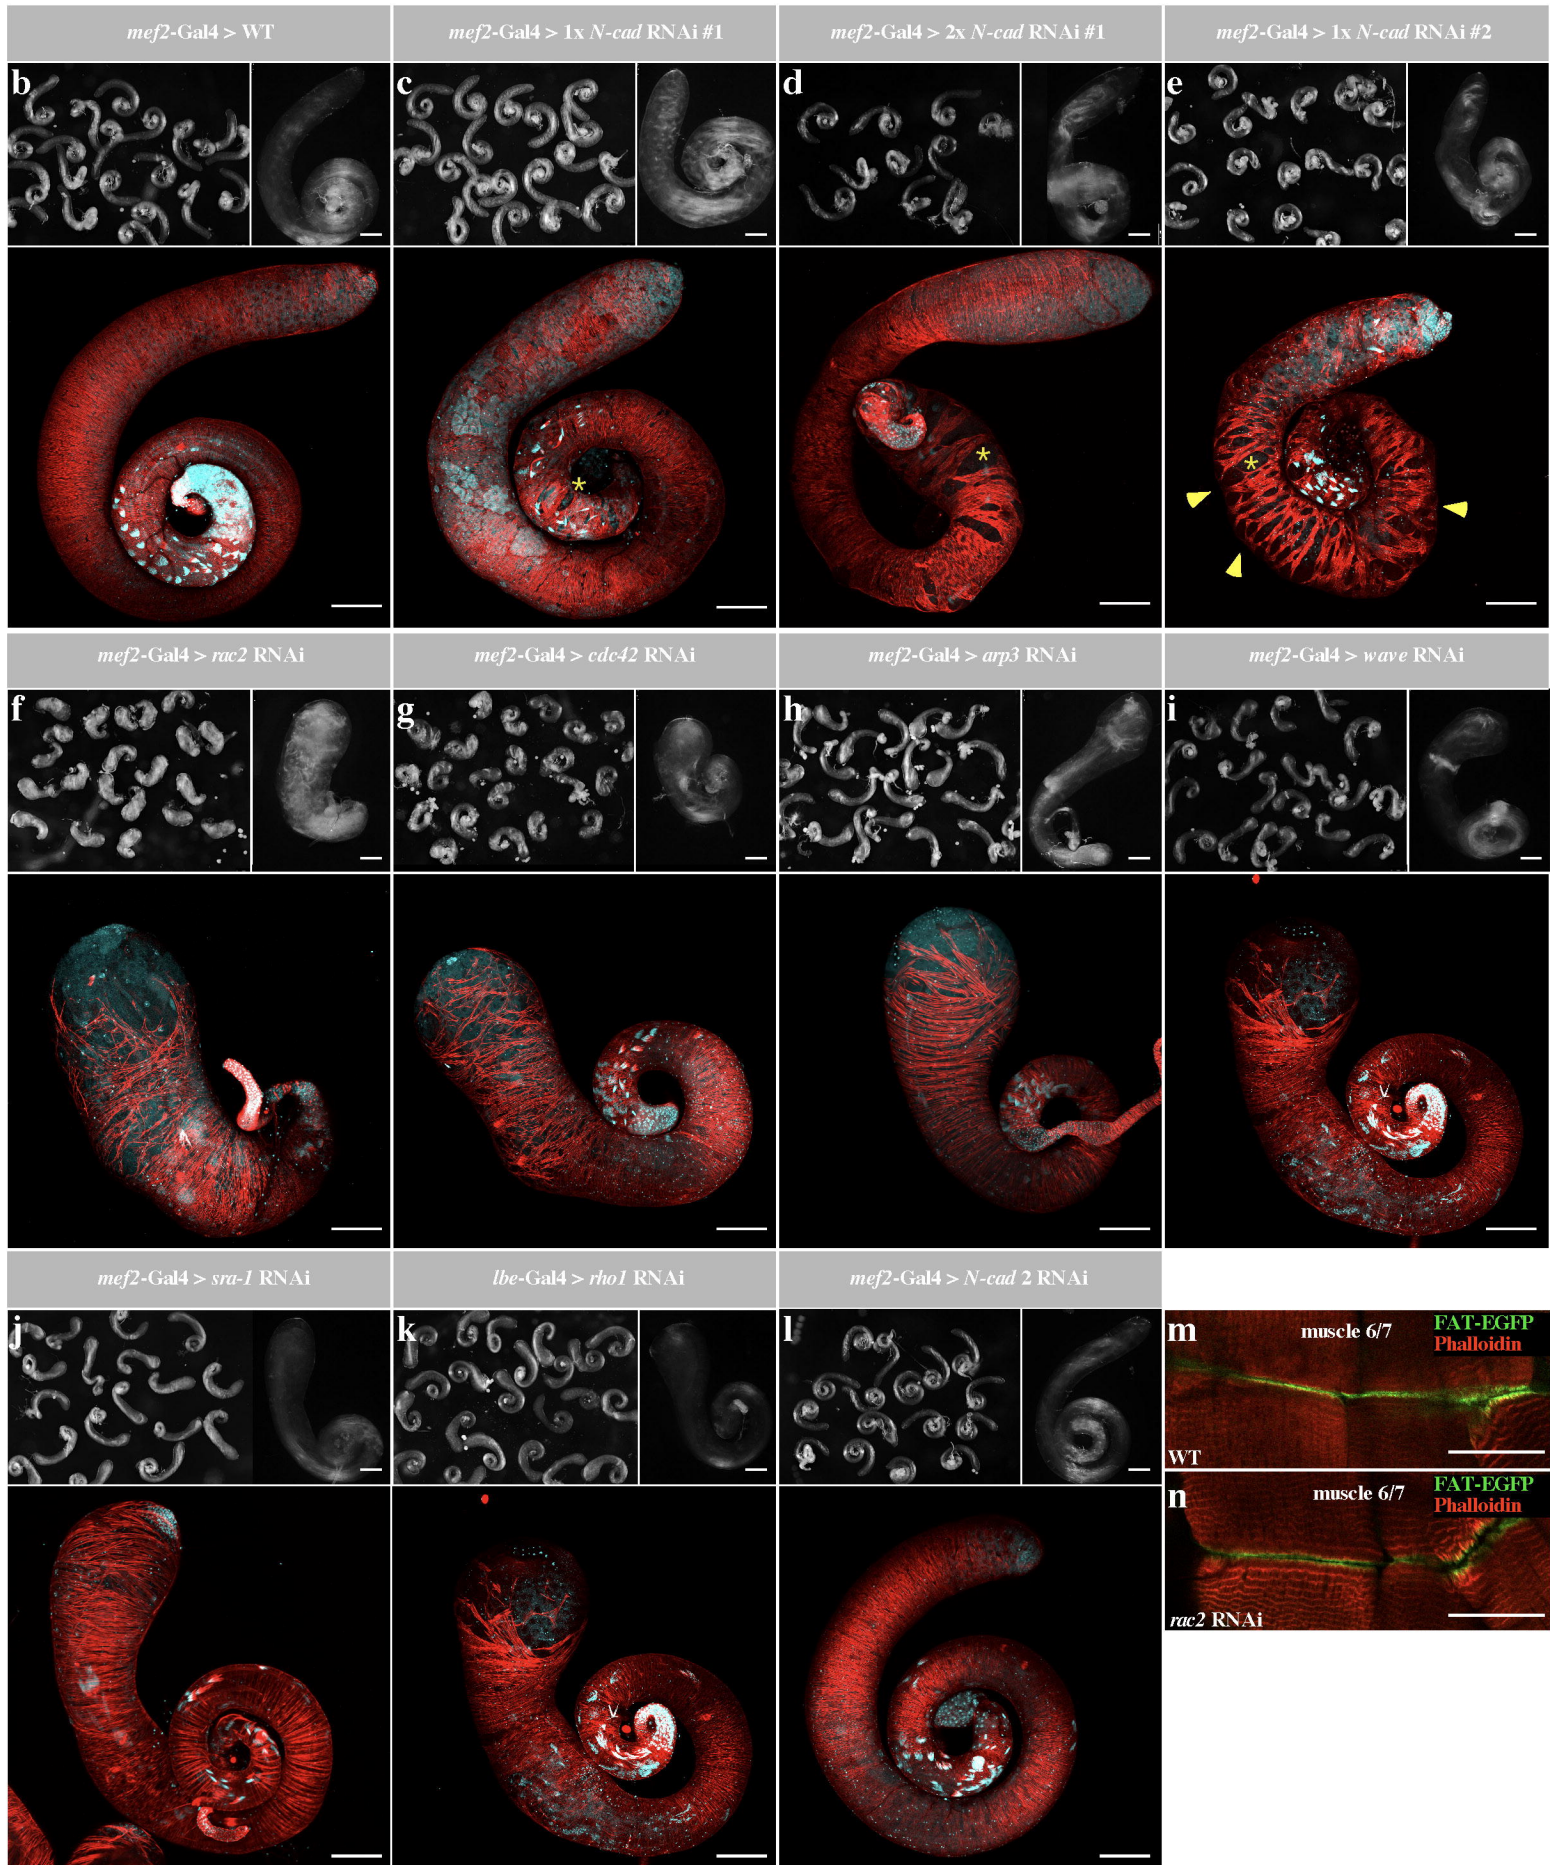

Supplementary figure S1



**a**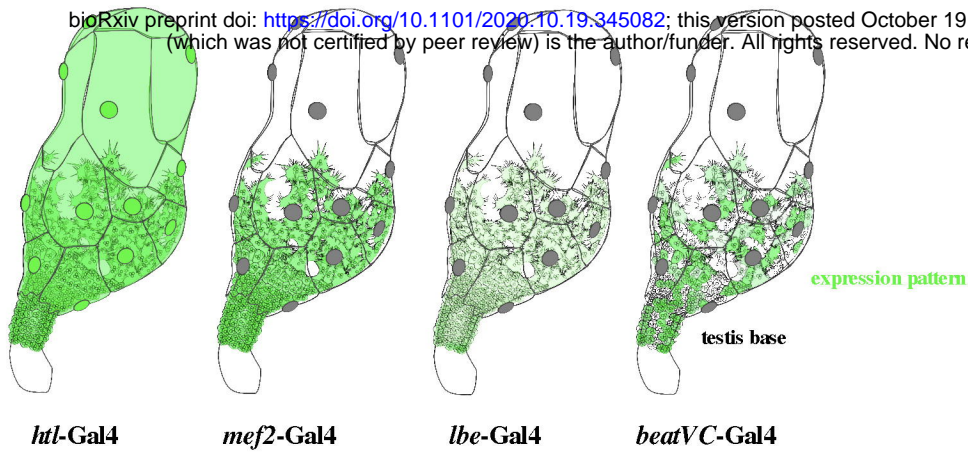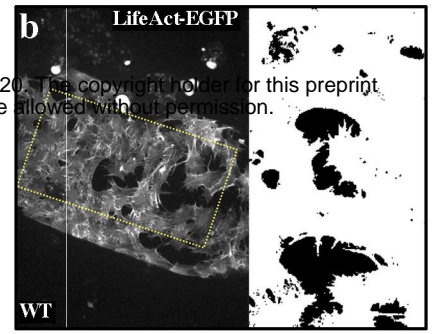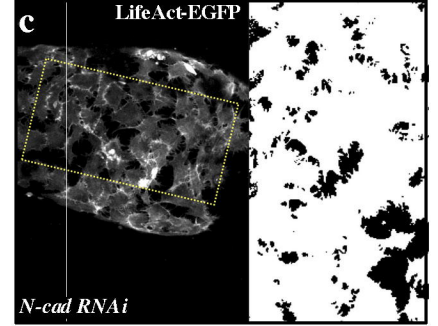**d**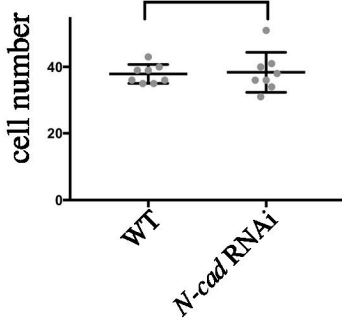**e**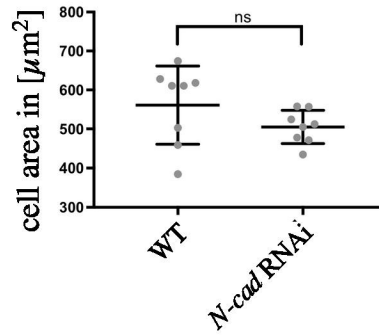**f**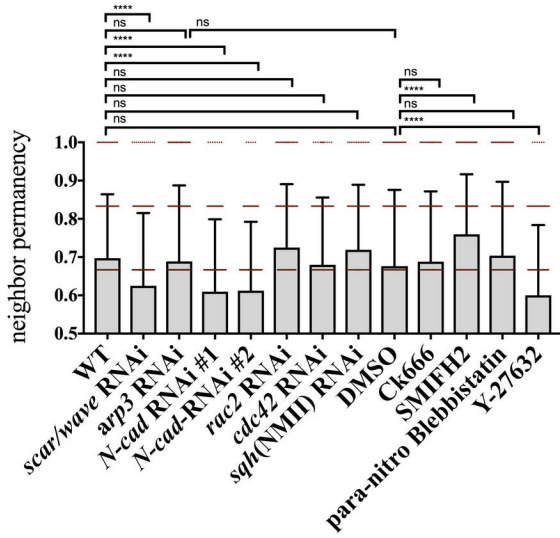**g**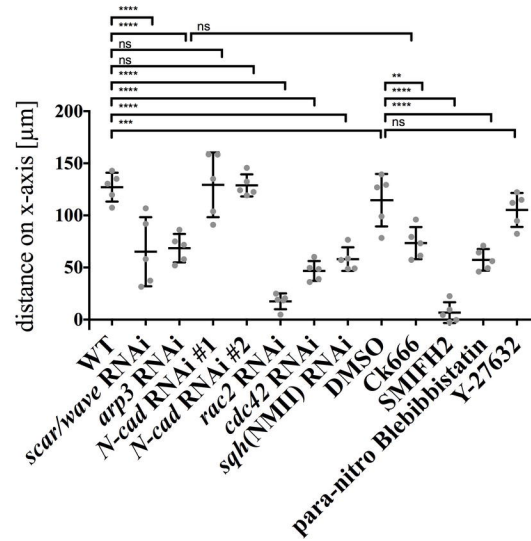**h**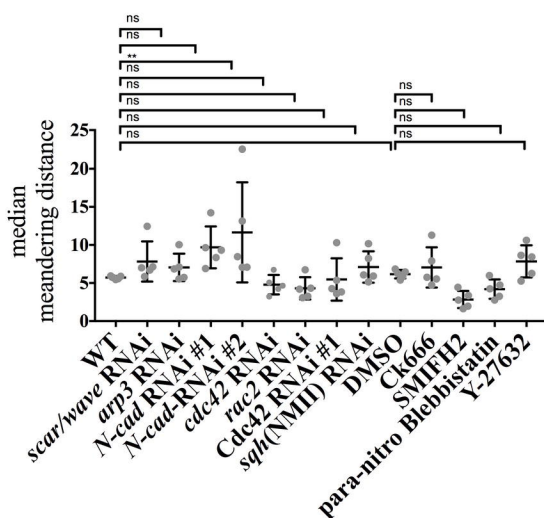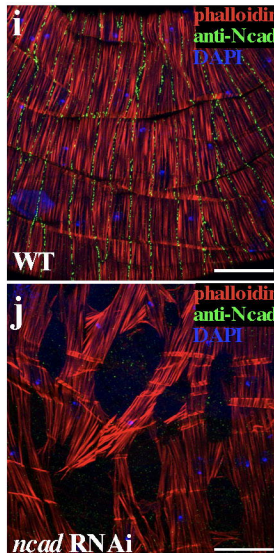**k**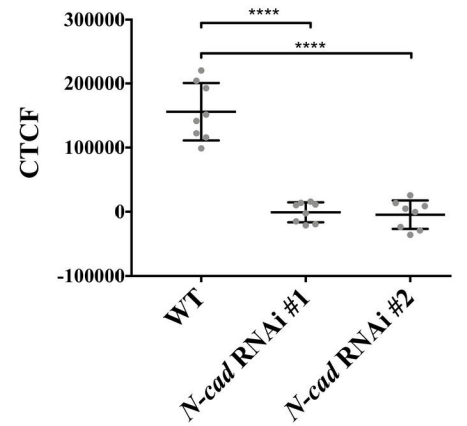

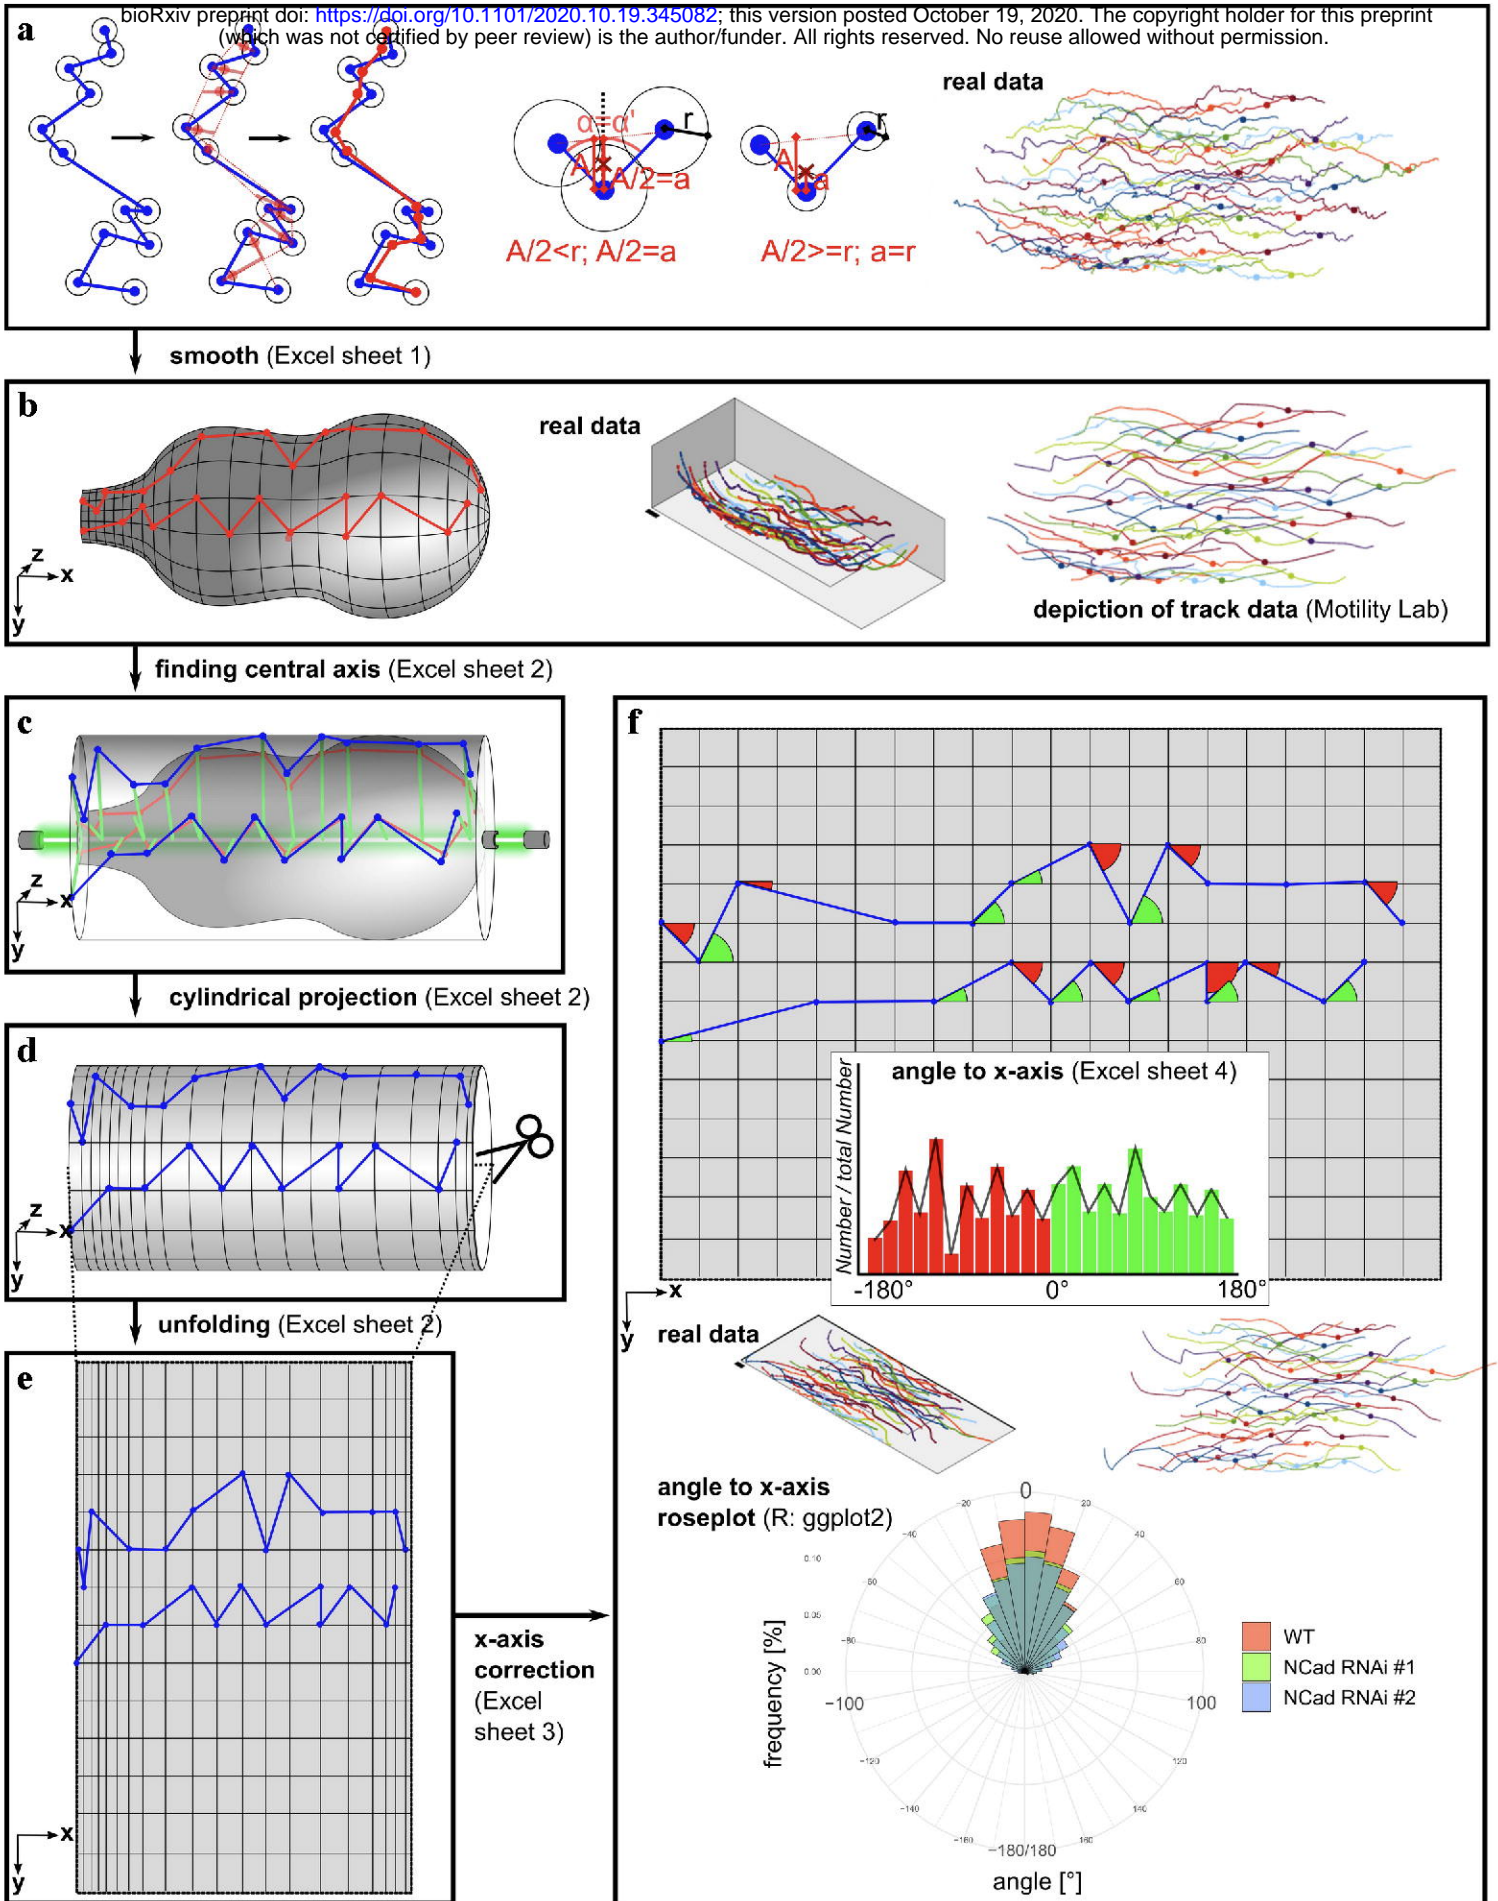



| <b>effector</b>           | <b>fly line ID</b>        | <b>driver</b>   | <b>phenotypic strength</b>        |
|---------------------------|---------------------------|-----------------|-----------------------------------|
| <b>UAS-Ncad RNAi</b>      | v1092                     | <i>htl-Gal4</i> | defective adhesion                |
|                           | v1092                     | <i>mef-Gal4</i> | defective adhesion                |
|                           | v1093 ( $\triangle$ #1)   | <i>htl-Gal4</i> | defective adhesion                |
|                           | v1093                     | <i>mef-Gal4</i> | defective adhesion                |
|                           | v101642 ( $\triangle$ #2) | <i>mef-Gal4</i> | defective adhesion                |
| <b>UAS-Ncad 2 RNAi</b>    | v101659                   | <i>mef-Gal4</i> | no phenotype                      |
|                           | v36166                    | <i>mef-Gal4</i> | no phenotype                      |
| <b>UAS-arp3 RNAi</b>      | v108951                   | <i>htl-Gal4</i> | medium migration defects          |
|                           | v108951                   | <i>mef-Gal4</i> | medium migration defects          |
|                           | v35258                    | <i>htl-Gal4</i> | medium migration defects          |
|                           | v35258                    | <i>mef-Gal4</i> | medium migration defects          |
|                           | BL-32921                  | <i>htl-Gal4</i> | no phenotype                      |
|                           | v35260                    | <i>htl-Gal4</i> | no phenotype                      |
| <b>UAS-arp2 RNAi</b>      | v29944                    | <i>Mef-Gal4</i> | medium migration defects          |
| <b>UAS-scar/wave RNAi</b> | NIG 4636R-1               | <i>htl-Gal4</i> | medium migration defects          |
|                           | NIG 4636R-1               | <i>mef-Gal4</i> | medium migration defects          |
|                           | BL-51803                  | <i>mef-Gal4</i> | medium migration defects          |
|                           | BL-36121                  | <i>mef-Gal4</i> | no phenotype                      |
|                           | BL-31126                  | <i>mef-Gal4</i> | no phenotype                      |
| <b>UAS-sra1 RNAi</b>      | BL-38294                  | <i>mef-Gal4</i> | medium migration defects          |
| <b>UAS-rac2 RNAi</b>      | NIG-8556R-1               | <i>mef-Gal4</i> | strong migration defects          |
|                           | NIG-8556R-3               | <i>mef-Gal4</i> | strong migration defects          |
|                           | v28926                    | <i>mef-Gal4</i> | no phenotype                      |
|                           | v50349                    | <i>mef-Gal4</i> | no phenotype                      |
|                           | v50350                    | <i>mef-Gal4</i> | no phenotype                      |
| <b>UAS-rac1 RNAi</b>      | BL-28985                  | <i>mef-Gal4</i> | no phenotype                      |
|                           | BL-34910                  | <i>mef-Gal4</i> | no phenotype                      |
|                           | v49246                    | <i>mef-Gal4</i> | no phenotype                      |
| <b>UAS-mtl RNAi</b>       | v108427                   | <i>mef-Gal4</i> | no phenotype                      |
| <b>UAS-cdc42 RNAi</b>     | BL-28021                  | <i>htl-Gal4</i> | strong - medium migration defects |
|                           | BL-28021                  | <i>mef-Gal4</i> | strong migration defects          |
|                           | v100794                   | <i>mef-Gal4</i> | medium migration defects          |
| <b>UAS-rho1 RNAi</b>      | v12734                    | <i>mef-Gal4</i> | lethal                            |
|                           | BL-27727                  | <i>mef-Gal4</i> | lethal                            |
|                           | BL-32383                  | <i>mef-Gal4</i> | lethal                            |
|                           | BL-32383                  | <i>lbe-Gal4</i> | medium migration defects          |
|                           | v109420                   | <i>mef-Gal4</i> | no phenotype                      |
| <b>UAS-rhoL RNAi</b>      | v102461                   | <i>mef-Gal4</i> | no phenotype                      |
| <b>UAS-dia RNAi</b>       | v20518                    | <i>htl-Gal4</i> | strong migration defects          |
|                           | v20518                    | <i>mef-Gal4</i> | no phenotype                      |
|                           | BL-25955                  | <i>mef-Gal4</i> | no phenotype                      |
| <b>UAS-capu RNAi</b>      | v34278                    | <i>htl-Gal4</i> | no phenotype                      |
| <b>UAS-form RNAi</b>      | v107473                   | <i>htl-Gal4</i> | no phenotype                      |
|                           | v45594                    | <i>htl-Gal4</i> | no phenotype                      |
|                           | v42302                    | <i>htl-Gal4</i> | no phenotype                      |
| <b>UAS-daam RNAi</b>      | v24885                    | <i>htl-Gal4</i> | no phenotype                      |
| <b>UAS-fri RNAi</b>       | v34412                    | <i>htl-Gal4</i> | no phenotype                      |
|                           | v34413                    | <i>htl-Gal4</i> | no phenotype                      |
| <b>UAS-fhos RNAi</b>      | v45837                    | <i>htl-Gal4</i> | no phenotype                      |
|                           | v45838                    | <i>htl-Gal4</i> | no phenotype                      |
|                           | v34034                    | <i>htl-Gal4</i> | no phenotype                      |
|                           | v34035                    | <i>htl-Gal4</i> | no phenotype                      |
|                           | v108347                   | <i>htl-Gal4</i> | no phenotype                      |
| <b>UAS-sqh RNAi</b>       | v7916                     | <i>mef-Gal4</i> | strong migration defects          |
|                           | v7917                     | <i>mef-Gal4</i> | medium migration defects          |
|                           | v109493                   | <i>mef-Gal4</i> | medium migration defects          |
| <b>UAS-zip RNAi</b>       | v7819                     | <i>mef-Gal4</i> | strong migration defects          |
| <b>UAS-mys RNAi</b>       | v103704                   | <i>htl-Gal4</i> | lethal                            |
|                           | v103704                   | <i>mef-Gal4</i> | lethal                            |
|                           | v103704                   | <i>lbe-Gal4</i> | strong – no migration defects     |
